# Supplementary material for: The effects of graded levels of calorie restriction: XI. Evaluation of the main hypotheses underpinning the life extension effects of CR using the hepatic transcriptome
Source: PubMed Central journal article supplement (PMC5559174; doi:10.18632/aging.101269), 2017-07-31
Supplement: aging-09-1770-s001.pdf [file aging-09-1770-s001.pdf]

## SUPPLEMENTARY MATERIAL

**Table S1. Expression levels of genes involved in insulin/IGF-1 signaling pathway correlated with the increase in calorie restriction (CR) and their gene expression at each level of CR relative to 12h ad libitum intake.**

| Symbol | Gene Symbol     | <i>r</i> | 10CR   |          | 20CR   |          | 30CR   |          | 40CR   |          |
|--------|-----------------|----------|--------|----------|--------|----------|--------|----------|--------|----------|
|        |                 |          | Log FC | <i>p</i> | Log FC | <i>p</i> | Log FC | <i>p</i> | Log FC | <i>p</i> |
| 4E-BP1 | <i>Eif4ebp1</i> | -0.227   | -0.055 | 0.711    | 0.056  | 0.689    | -0.305 | 0.043    | -0.295 | 0.026    |
| ACLY   | <i>Acly</i>     | -0.339   | -1.654 | 0.002    | -1.324 | 0.007    | -0.787 | 0.124    | -1.310 | 0.003    |
| AFX    | <i>Foxo4</i>    | -0.308   | -0.115 | 0.519    | -0.305 | 0.073    | -0.185 | 0.301    | -0.261 | 0.098    |
| BAD    | <i>Bad</i>      | 0.476    | -0.024 | 0.925    | 0.089  | 0.711    | 0.240  | 0.339    | 0.415  | 0.062    |
| c-FOS  | <i>Fos</i>      | 0.121    | -1.152 | 0.104    | 0.271  | 0.656    | -0.193 | 0.770    | 0.217  | 0.705    |
| c-JUN  | <i>Jun</i>      | -0.025   | -0.027 | 0.943    | 0.834  | 0.017    | -0.052 | 0.891    | -0.014 | 0.966    |
| c-RAF  | <i>Raf1</i>     | -0.299   | -0.165 | 0.253    | -0.215 | 0.116    | -0.278 | 0.055    | -0.247 | 0.052    |
| C3G    | <i>Rapgef1</i>  | 0.321    | 0.178  | 0.169    | 0.258  | 0.036    | 0.109  | 0.400    | 0.215  | 0.062    |
| CASP9  | <i>Casp9</i>    | -0.257   | -0.279 | 0.109    | -0.157 | 0.336    | -0.164 | 0.344    | -0.471 | 0.002    |
| CBL    | <i>Cbl</i>      | 0.217    | -0.226 | 0.512    | 0.034  | 0.916    | 0.044  | 0.897    | 0.089  | 0.766    |
| CIP4   | <i>Trip10</i>   | 0.217    | 0.211  | 0.281    | 0.383  | 0.037    | 0.256  | 0.190    | 0.281  | 0.107    |
| eIF4E  | <i>Eif4e</i>    | -0.131   | -0.018 | 0.898    | -0.044 | 0.746    | 0.139  | 0.325    | 0.069  | 0.582    |
| ELK-1  | <i>Elk1</i>     | -0.377   | -0.063 | 0.808    | 0.045  | 0.852    | -0.388 | 0.142    | -0.412 | 0.077    |
| FAK    | <i>Ptk2</i>     | -0.093   | 0.133  | 0.357    | 0.032  | 0.819    | -0.038 | 0.797    | 0.021  | 0.873    |
| FKHRL1 | <i>Foxo3</i>    | 0.168    | -0.019 | 0.924    | -0.241 | 0.220    | -0.120 | 0.562    | 0.015  | 0.933    |
| FYN    | <i>Fyn</i>      | -0.297   | 0.002  | 0.993    | 0.118  | 0.519    | 0.012  | 0.953    | -0.240 | 0.171    |
| GAB1   | <i>Gab1</i>     | 0.370    | 0.234  | 0.149    | 0.187  | 0.227    | 0.188  | 0.248    | 0.200  | 0.169    |
| GLUT4  | <i>Slc2a4</i>   | 0.168    | -1.636 | 0.013    | -0.688 | 0.244    | 0.257  | 0.671    | -0.059 | 0.913    |
| GRB10  | <i>Grb10</i>    | -0.142   | 0.242  | 0.536    | 0.444  | 0.231    | -0.550 | 0.178    | -0.432 | 0.224    |
| GRB2   | <i>Grb2</i>     | -0.346   | -0.098 | 0.434    | 0.003  | 0.982    | -0.104 | 0.405    | -0.123 | 0.266    |
| IGF-1  | <i>Igfl</i>     | 0.160    | 0.284  | 0.223    | -0.005 | 0.983    | 0.321  | 0.169    | 0.053  | 0.800    |
| IGF1R  | <i>Igflr</i>    | 0.293    | 0.371  | 0.297    | 0.573  | 0.088    | 0.257  | 0.476    | 0.693  | 0.029    |
| INSR   | <i>Insr</i>     | 0.507    | 0.106  | 0.572    | -0.076 | 0.670    | 0.153  | 0.414    | 0.245  | 0.141    |
| IRS1   | <i>Irs1</i>     | 0.120    | -0.229 | 0.408    | -0.191 | 0.466    | -0.129 | 0.639    | 0.412  | 0.089    |
| JNK1   | <i>Mapk8</i>    | 0.392    | 0.183  | 0.239    | 0.051  | 0.730    | 0.211  | 0.173    | 0.312  | 0.023    |
| LAR    | <i>Ptprf</i>    | -0.623   | -0.293 | 0.176    | -0.325 | 0.113    | -0.615 | 0.005    | -0.594 | 0.002    |
| LIPE   | <i>Lipe</i>     | -0.141   | -0.183 | 0.446    | -0.270 | 0.235    | -0.265 | 0.271    | -0.431 | 0.043    |
| mTOR   | <i>Mtor</i>     | -0.119   | 0.060  | 0.704    | 0.159  | 0.289    | 0.043  | 0.787    | -0.122 | 0.384    |
| NCK    | <i>Nck1</i>     | -0.176   | -0.094 | 0.564    | -0.169 | 0.274    | -0.205 | 0.212    | -0.137 | 0.343    |
| PDE3B  | <i>Pde3b</i>    | 0.488    | 0.236  | 0.276    | 0.162  | 0.432    | 0.418  | 0.053    | 0.415  | 0.031    |
| PKD1   | <i>Pdpk1</i>    | 0.279    | 0.092  | 0.564    | 0.054  | 0.723    | -0.018 | 0.910    | 0.220  | 0.120    |
| PTEN   | <i>Pten</i>     | 0.131    | 0.001  | 0.995    | -0.097 | 0.595    | 0.069  | 0.717    | 0.041  | 0.807    |
| PTP1B  | <i>Ptpn1</i>    | 0.112    | 0.040  | 0.799    | 0.261  | 0.075    | 0.112  | 0.472    | 0.153  | 0.266    |
| PXN    | <i>Pxn</i>      | 0.248    | -0.126 | 0.367    | 0.059  | 0.652    | -0.112 | 0.424    | 0.054  | 0.661    |
| RAPTOR | <i>Rptor</i>    | -0.214   | -0.063 | 0.667    | -0.104 | 0.450    | -0.167 | 0.254    | -0.175 | 0.176    |
| RAS    |                 |          |        |          |        |          |        |          |        |          |
| GAP    | <i>Rasa1</i>    | 0.001    | 0.057  | 0.695    | -0.090 | 0.516    | -0.034 | 0.818    | -0.048 | 0.710    |
| SGK    | <i>Sgk1</i>     | 0.108    | 0.275  | 0.330    | 0.580  | 0.030    | 0.500  | 0.075    | 0.479  | 0.057    |
| SHC    | <i>Shc1</i>     | -0.180   | -0.091 | 0.512    | 0.026  | 0.845    | -0.072 | 0.607    | -0.258 | 0.036    |
| SHP2   | <i>Ptpn11</i>   | 0.124    | 0.155  | 0.295    | 0.114  | 0.418    | 0.045  | 0.764    | 0.179  | 0.173    |
| SOCS3  | <i>Socs3</i>    | -0.221   | -0.655 | 0.148    | -0.046 | 0.913    | -0.919 | 0.045    | -0.677 | 0.086    |
| SRF    | <i>Srf</i>      | -0.308   | -0.259 | 0.175    | -0.140 | 0.434    | -0.432 | 0.026    | -0.155 | 0.353    |
| STAT3  | <i>Stat3</i>    | 0.227    | -0.364 | 0.151    | 0.348  | 0.142    | 0.043  | 0.862    | 0.271  | 0.223    |
| STX4   | <i>Stx4a</i>    | -0.442   | -0.455 | 0.021    | -0.771 | 0.000    | -0.361 | 0.065    | -0.572 | 0.001    |
| SYNIP  | <i>Stxbp4</i>   | -0.129   | -0.026 | 0.941    | -0.099 | 0.763    | -0.295 | 0.406    | -0.473 | 0.134    |

|       |              |       |        |       |        |       |       |       |       |       |
|-------|--------------|-------|--------|-------|--------|-------|-------|-------|-------|-------|
| TC10  | <i>Rhoq</i>  | 0.483 | 0.240  | 0.171 | 0.245  | 0.143 | 0.319 | 0.068 | 0.428 | 0.006 |
| TSC1  | <i>Tsc1</i>  | 0.205 | -0.028 | 0.846 | -0.272 | 0.047 | 0.014 | 0.922 | 0.046 | 0.713 |
| TSC2  | <i>Tsc2</i>  | 0.011 | 0.078  | 0.581 | 0.119  | 0.371 | 0.094 | 0.503 | 0.058 | 0.643 |
| VAMP2 | <i>Vamp2</i> | 0.381 | -0.001 | 0.992 | -0.017 | 0.882 | 0.035 | 0.774 | 0.032 | 0.770 |

**Table S2. Expression levels of genes involved in mTOR signaling pathway correlated with the increase in calorie restriction (CR) and their gene expression at each level of CR relative to 12h ad libitum intake.**

| Symbol        | Gene Symbol     | 10CR   |        |       | 20CR   |       | 30CR   |       | 40CR   |       |
|---------------|-----------------|--------|--------|-------|--------|-------|--------|-------|--------|-------|
|               |                 | r      | logFC  | p     | logFC  | p     | logFC  | p     | logFC  | p     |
| 4EBP          | <i>Eif4ebp1</i> | -0.227 | -0.055 | 0.711 | 0.056  | 0.689 | -0.305 | 0.043 | -0.295 | 0.026 |
| ATG13         | <i>Atg13</i>    | -0.003 | -0.132 | 0.372 | -0.241 | 0.088 | -0.143 | 0.335 | -0.097 | 0.458 |
| DGK $\zeta$   | <i>Dgkz</i>     | 0.070  | 0.067  | 0.655 | 0.249  | 0.080 | 0.041  | 0.784 | 0.090  | 0.499 |
| eIF4B         | <i>Eif4b</i>    | -0.188 | -0.026 | 0.882 | -0.097 | 0.566 | -0.054 | 0.761 | -0.245 | 0.120 |
| eIF4E         | <i>Eif4e</i>    | -0.131 | -0.018 | 0.898 | -0.044 | 0.746 | 0.139  | 0.325 | 0.069  | 0.582 |
| FKBP1         | <i>Fkbp1a</i>   | -0.007 | 0.028  | 0.861 | 0.289  | 0.054 | 0.119  | 0.454 | 0.089  | 0.528 |
| GBL           | <i>Mlst8</i>    | -0.440 | 0.244  | 0.367 | 0.231  | 0.369 | -0.230 | 0.413 | -0.196 | 0.428 |
| HIF1 $\alpha$ | <i>Hif1a</i>    | 0.060  | 0.008  | 0.954 | -0.089 | 0.502 | -0.113 | 0.421 | -0.054 | 0.661 |
| INSR          | <i>Insr</i>     | 0.507  | 0.106  | 0.572 | -0.076 | 0.670 | 0.153  | 0.414 | 0.245  | 0.141 |
| IRS1          | <i>Irs1</i>     | 0.120  | -0.229 | 0.408 | -0.191 | 0.466 | -0.129 | 0.639 | 0.412  | 0.089 |
| LKB1          | <i>Stk11</i>    | -0.353 | 0.037  | 0.776 | -0.073 | 0.558 | -0.158 | 0.232 | -0.165 | 0.159 |
| mTOR          | <i>Mtor</i>     | -0.119 | 0.060  | 0.704 | 0.159  | 0.289 | 0.043  | 0.787 | -0.122 | 0.384 |
| p70S6K        | <i>Rps6kb1</i>  | 0.112  | 0.098  | 0.566 | -0.043 | 0.791 | 0.022  | 0.899 | 0.131  | 0.384 |
| PDK1          | <i>Pdk1</i>     | 0.279  | 0.092  | 0.564 | 0.054  | 0.723 | -0.018 | 0.910 | 0.220  | 0.120 |
| PKC $\alpha$  | <i>Prkca</i>    | 0.269  | 0.134  | 0.509 | 0.079  | 0.681 | 0.151  | 0.455 | 0.296  | 0.099 |
| PRAS40        | <i>Akt1s1</i>   | -0.256 | -0.189 | 0.199 | -0.139 | 0.315 | -0.208 | 0.159 | -0.257 | 0.048 |
| RAC           | <i>Rac1</i>     | -0.077 | -0.032 | 0.801 | -0.003 | 0.981 | -0.037 | 0.773 | -0.059 | 0.604 |
| RAPTOR        | <i>Rptor</i>    | -0.214 | -0.063 | 0.667 | -0.104 | 0.450 | -0.167 | 0.254 | -0.175 | 0.176 |
| REDD1         | <i>Ddit4</i>    | 0.446  | 0.176  | 0.752 | 0.840  | 0.106 | 0.954  | 0.078 | 1.777  | 0.000 |
| RHEB          | <i>Rheb</i>     | 0.222  | 0.117  | 0.447 | 0.184  | 0.205 | 0.092  | 0.548 | 0.222  | 0.103 |
| RICTOR        | <i>Rictor</i>   | 0.328  | 0.312  | 0.161 | 0.231  | 0.276 | 0.270  | 0.226 | 0.332  | 0.094 |
| RPS6          | <i>Rps6</i>     | 0.487  | -0.032 | 0.858 | 0.035  | 0.839 | 0.163  | 0.364 | 0.268  | 0.093 |
| SIN1          | <i>Mapkap1</i>  | -0.318 | -0.018 | 0.889 | -0.119 | 0.345 | -0.118 | 0.375 | -0.131 | 0.267 |
| TSC1          | <i>Tsc1</i>     | 0.205  | -0.028 | 0.846 | -0.272 | 0.047 | 0.014  | 0.922 | 0.046  | 0.713 |
| TSC2          | <i>Tsc2</i>     | 0.011  | 0.078  | 0.581 | 0.119  | 0.371 | 0.094  | 0.503 | 0.058  | 0.643 |
| ULK1          | <i>Ulk1</i>     | -0.040 | -0.384 | 0.029 | -0.214 | 0.197 | -0.290 | 0.098 | -0.103 | 0.504 |

**Table S3. Expression levels of genes involved in NF- $\kappa$ B signaling pathway correlated with the increase in calorie restriction (CR) and their gene expression at each level of CR relative to 12h ad libitum intake.**

| Symbol        | Gene Symbol    | 10CR   |        |       | 20CR   |       | 30CR   |       | 40CR   |       |
|---------------|----------------|--------|--------|-------|--------|-------|--------|-------|--------|-------|
|               |                | r      | logFC  | p     | logFC  | p     | logFC  | p     | logFC  | p     |
| $\beta$ -TrCP | <i>Btrc</i>    | -0.112 | -0.003 | 0.986 | 0.009  | 0.958 | 0.020  | 0.913 | -0.157 | 0.337 |
| A20           | <i>Tnfaip3</i> | -0.100 | 0.218  | 0.582 | 0.351  | 0.349 | -0.399 | 0.334 | -0.311 | 0.389 |
| ABIN-1        | <i>Tnip1</i>   | -0.219 | -0.115 | 0.764 | 0.330  | 0.358 | -0.569 | 0.146 | -0.645 | 0.059 |
| Bcl10         | <i>Bcl10</i>   | 0.106  | -0.238 | 0.314 | 0.110  | 0.616 | 0.101  | 0.663 | 0.007  | 0.975 |
| BIMP1         | <i>Card10</i>  | 0.062  | 0.207  | 0.354 | 0.318  | 0.132 | 0.231  | 0.302 | 0.120  | 0.548 |
| c-RAF         | <i>Raf1</i>    | -0.299 | -0.165 | 0.253 | -0.215 | 0.116 | -0.278 | 0.055 | -0.247 | 0.052 |

|                |                 |        |        |       |        |       |        |       |        |       |
|----------------|-----------------|--------|--------|-------|--------|-------|--------|-------|--------|-------|
| CARD11         | <i>Card11</i>   | -0.294 | -0.096 | 0.883 | -0.445 | 0.479 | -0.963 | 0.166 | -1.573 | 0.013 |
| Caspase8       | <i>Casp8</i>    | 0.075  | 0.093  | 0.508 | 0.039  | 0.770 | 0.047  | 0.737 | -0.072 | 0.568 |
| CCR5           | <i>Ccr5</i>     | -0.087 | 0.160  | 0.608 | 0.536  | 0.065 | 0.350  | 0.258 | 0.112  | 0.687 |
| CD4            | <i>Cd4</i>      | -0.550 | -0.161 | 0.797 | -0.779 | 0.204 | -2.064 | 0.005 | -1.509 | 0.011 |
| Cot            | <i>Map3k8</i>   | 0.125  | -0.422 | 0.256 | -0.131 | 0.703 | -0.368 | 0.321 | -0.050 | 0.877 |
| FADD           | <i>Fadd</i>     | -0.480 | -0.293 | 0.095 | -0.301 | 0.070 | -0.415 | 0.019 | -0.565 | 0.000 |
| GSK-3β         | <i>Gsk3b</i>    | 0.117  | 0.144  | 0.273 | 0.063  | 0.614 | 0.006  | 0.966 | 0.095  | 0.416 |
| HVEM           | <i>Tnfrsf14</i> | -0.030 | 0.162  | 0.622 | 0.339  | 0.270 | 0.186  | 0.572 | -0.191 | 0.528 |
| IKKα           | <i>Chuk</i>     | 0.065  | 0.152  | 0.458 | -0.183 | 0.349 | 0.035  | 0.865 | -0.021 | 0.908 |
| IKKβ           | <i>Ikkkb</i>    | -0.137 | -0.011 | 0.926 | -0.068 | 0.535 | -0.054 | 0.646 | -0.124 | 0.230 |
| IKKγ           | <i>Ikkbg</i>    | -0.099 | 0.213  | 0.163 | 0.202  | 0.165 | -0.021 | 0.892 | 0.072  | 0.599 |
| IRAK-M         | <i>Irak3</i>    | 0.031  | -0.275 | 0.389 | -0.126 | 0.671 | -0.430 | 0.187 | 0.047  | 0.865 |
| JNK1           | <i>Mapk8</i>    | 0.392  | 0.183  | 0.239 | 0.051  | 0.730 | 0.211  | 0.173 | 0.312  | 0.023 |
| LTBR           | <i>Ltbr</i>     | -0.028 | -0.067 | 0.630 | 0.041  | 0.755 | -0.107 | 0.442 | -0.024 | 0.844 |
| MALT1          | <i>Malt1</i>    | -0.026 | 0.070  | 0.704 | -0.135 | 0.446 | -0.024 | 0.899 | -0.040 | 0.808 |
| MEKK1          | <i>Map3k1</i>   | -0.017 | 0.233  | 0.317 | 0.167  | 0.452 | -0.016 | 0.946 | 0.145  | 0.486 |
| MYD88          | <i>Myd88</i>    | 0.040  | -0.245 | 0.162 | -0.095 | 0.564 | -0.174 | 0.318 | 0.009  | 0.954 |
| NAK            | <i>Tbk1</i>     | 0.311  | -0.048 | 0.771 | -0.089 | 0.570 | -0.024 | 0.883 | 0.254  | 0.079 |
| NAP1           | <i>Azi2</i>     | 0.566  | 0.166  | 0.283 | -0.040 | 0.784 | 0.281  | 0.067 | 0.236  | 0.085 |
| NF-κB1<br>p50  | <i>Nfkb1</i>    | -0.133 | 0.105  | 0.571 | -0.092 | 0.605 | -0.161 | 0.396 | -0.100 | 0.548 |
| NF-κB2<br>p100 | <i>Nfkb2</i>    | -0.234 | 0.203  | 0.592 | 0.479  | 0.182 | -0.394 | 0.313 | -0.734 | 0.034 |
| NGF            | <i>Ngf</i>      | -0.225 | 0.430  | 0.558 | 0.679  | 0.333 | -0.142 | 0.850 | -0.245 | 0.711 |
| NIK            | <i>Map3k14</i>  | 0.156  | 0.511  | 0.241 | 1.164  | 0.004 | 0.402  | 0.361 | 0.667  | 0.088 |
| p65/RelA       | <i>Rela</i>     | -0.300 | -0.150 | 0.371 | -0.134 | 0.396 | -0.409 | 0.016 | -0.292 | 0.049 |
| PELI1          | <i>Peli1</i>    | 0.206  | 0.022  | 0.896 | -0.185 | 0.247 | -0.106 | 0.527 | 0.025  | 0.866 |
| PKCζ           | <i>Prkcz</i>    | -0.322 | -0.132 | 0.538 | -0.358 | 0.081 | -0.368 | 0.089 | -0.566 | 0.003 |
| PKR            | <i>Eif2ak2</i>  | -0.007 | 0.058  | 0.719 | -0.039 | 0.801 | 0.057  | 0.727 | 0.084  | 0.559 |
| PLCy2          | <i>Plcg2</i>    | -0.289 | 0.043  | 0.917 | 0.196  | 0.619 | -0.318 | 0.454 | -1.239 | 0.001 |
| RelB           | <i>Relb</i>     | -0.255 | 0.435  | 0.434 | 0.567  | 0.283 | -0.477 | 0.414 | -1.635 | 0.003 |
| RIP            | <i>Ripk1</i>    | 0.125  | 0.025  | 0.864 | 0.012  | 0.927 | -0.139 | 0.336 | 0.063  | 0.619 |
| TAB1           | <i>Tab1</i>     | 0.100  | 0.458  | 0.179 | 0.301  | 0.358 | 0.341  | 0.323 | 0.388  | 0.207 |
| TANK           | <i>Tank</i>     | -0.150 | 0.138  | 0.360 | -0.049 | 0.734 | -0.178 | 0.250 | 0.035  | 0.793 |
| TBP            | <i>Tbp</i>      | 0.368  | 0.146  | 0.476 | 0.122  | 0.531 | 0.052  | 0.803 | 0.443  | 0.014 |
| TGF-α          | <i>Tgfa</i>     | -0.169 | -0.020 | 0.907 | -0.033 | 0.844 | -0.340 | 0.057 | -0.297 | 0.058 |
| TIRAP          | <i>Tirap</i>    | -0.481 | -0.091 | 0.608 | -0.187 | 0.267 | -0.044 | 0.804 | -0.222 | 0.157 |
| TRADD          | <i>Tradd</i>    | -0.114 | -0.526 | 0.016 | -0.135 | 0.494 | -0.100 | 0.631 | -0.240 | 0.198 |
| TRAF2          | <i>Traf2</i>    | -0.004 | 0.326  | 0.163 | 0.400  | 0.071 | 0.112  | 0.638 | 0.206  | 0.330 |
| TRAF6          | <i>Traf6</i>    | 0.420  | 0.135  | 0.414 | 0.082  | 0.601 | 0.150  | 0.365 | 0.383  | 0.009 |
| TTRAP          | <i>Tdp2</i>     | 0.498  | 0.012  | 0.949 | 0.050  | 0.787 | 0.382  | 0.047 | 0.288  | 0.094 |
| UBE2N          | <i>Ube2n</i>    | -0.386 | -0.143 | 0.276 | -0.157 | 0.209 | -0.223 | 0.092 | -0.120 | 0.302 |
| UBE2V1         | <i>Ube2v1</i>   | -0.301 | -0.096 | 0.446 | 0.027  | 0.818 | -0.069 | 0.584 | -0.080 | 0.472 |
| Zap70          | <i>Zap70</i>    | -0.169 | 0.242  | 0.441 | 0.624  | 0.034 | 0.314  | 0.316 | -0.250 | 0.381 |

**Table S4. Expression levels of genes involved in sirtuin signaling pathway correlated with the increase in calorie restriction (CR) and their gene expression at each level of CR relative to 12h ad libitum intake.**

| Symbol | Gene<br>symbol | 10CR   |        |       | 20CR   |       | 30CR   |       | 40CR  |       |
|--------|----------------|--------|--------|-------|--------|-------|--------|-------|-------|-------|
|        |                | r      | logFC  | p     | logFC  | p     | logFC  | p     | logFC | p     |
| ACADL  | <i>Acadl</i>   | 0.763  | 0.111  | 0.612 | 0.263  | 0.208 | 0.468  | 0.032 | 0.557 | 0.005 |
| ARNTL  | <i>Arntl</i>   | -0.105 | -1.581 | 0.038 | -1.588 | 0.026 | -1.808 | 0.020 | 0.261 | 0.674 |

|          |                 |        |        |       |        |       |        |       |        |        |
|----------|-----------------|--------|--------|-------|--------|-------|--------|-------|--------|--------|
| BIRC5    | <i>Birc5</i>    | -0.039 | 0.321  | 0.580 | 1.432  | 0.008 | -0.403 | 0.507 | 0.053  | 0.920  |
| CDKN1A   | <i>Cdkn1a</i>   | 0.055  | 0.775  | 0.288 | 1.702  | 0.016 | -0.253 | 0.736 | 1.225  | 0.066  |
| CPS1     | <i>Cps1</i>     | 0.476  | -0.279 | 0.234 | -0.222 | 0.317 | 0.030  | 0.899 | 0.177  | 0.392  |
| CRTC2    | <i>Crtc2</i>    | 0.626  | 0.135  | 0.439 | 0.130  | 0.432 | 0.220  | 0.204 | 0.463  | 0.003  |
| CTNNB1   | <i>Ctnnb1</i>   | -0.363 | -0.100 | 0.550 | -0.083 | 0.601 | -0.220 | 0.190 | -0.268 | 0.069  |
| CYC1     | <i>Cyc1</i>     | 0.617  | -0.086 | 0.611 | 0.020  | 0.898 | 0.157  | 0.349 | 0.309  | 0.039  |
| CYCS     | <i>Cycs</i>     | 0.572  | 0.064  | 0.782 | -0.084 | 0.702 | 0.231  | 0.313 | 0.523  | 0.011  |
| E2F1     | <i>E2f1</i>     | -0.296 | 0.182  | 0.629 | 0.681  | 0.050 | -0.128 | 0.741 | -0.441 | 0.210  |
| EPAS1    | <i>Epas1</i>    | 0.343  | -0.396 | 0.183 | -0.125 | 0.655 | 0.108  | 0.714 | 0.108  | 0.678  |
| FOXO1    | <i>Foxo1</i>    | 0.603  | 0.236  | 0.302 | 0.322  | 0.139 | 0.382  | 0.094 | 0.681  | 0.001  |
| FOXO3    | <i>Foxo3</i>    | 0.168  | -0.019 | 0.924 | -0.241 | 0.220 | -0.120 | 0.562 | 0.015  | 0.933  |
| FOXO4    | <i>Foxo4</i>    | -0.308 | -0.115 | 0.519 | -0.305 | 0.073 | -0.185 | 0.301 | -0.261 | 0.098  |
| GLUD1    | <i>Glud1</i>    | 0.655  | -0.123 | 0.559 | 0.047  | 0.815 | 0.230  | 0.271 | 0.460  | 0.014  |
| HIF1A    | <i>Hif1a</i>    | 0.060  | 0.008  | 0.954 | -0.089 | 0.502 | -0.113 | 0.421 | -0.054 | 0.661  |
| HNF4A    | <i>Hnf4a</i>    | 0.338  | -0.104 | 0.665 | 0.075  | 0.744 | -0.060 | 0.802 | 0.316  | 0.139  |
| HSF1     | <i>Hsf1</i>     | 0.015  | -0.047 | 0.744 | -0.059 | 0.666 | -0.040 | 0.782 | 0.012  | 0.925  |
| IDE      | <i>Ide</i>      | -0.662 | -0.125 | 0.442 | -0.345 | 0.026 | -0.422 | 0.010 | -0.371 | 0.010  |
| IDH2     | <i>Idh2</i>     | 0.556  | 0.443  | 0.099 | 0.740  | 0.004 | 0.818  | 0.002 | 0.850  | <0.001 |
| MRPL10   | <i>Mrpl10</i>   | -0.223 | -0.127 | 0.302 | 0.007  | 0.949 | -0.188 | 0.131 | -0.035 | 0.747  |
| NDUFA9   | <i>Ndufa9</i>   | 0.506  | -0.136 | 0.385 | -0.142 | 0.340 | 0.097  | 0.535 | 0.240  | 0.082  |
| NFKB1    | <i>Nfkb1</i>    | -0.133 | 0.105  | 0.571 | -0.092 | 0.605 | -0.161 | 0.396 | -0.100 | 0.548  |
| NFKB2    | <i>Nfkb2</i>    | -0.234 | 0.203  | 0.592 | 0.479  | 0.182 | -0.394 | 0.313 | -0.734 | 0.034  |
| NR1H2    | <i>Nr1h2</i>    | 0.381  | -0.140 | 0.341 | 0.037  | 0.787 | 0.101  | 0.485 | 0.232  | 0.069  |
| NR1H3    | <i>Nr1h3</i>    | -0.540 | -0.134 | 0.458 | -0.134 | 0.432 | -0.152 | 0.397 | -0.344 | 0.030  |
| PARP1    | <i>Parp1</i>    | -0.363 | -0.176 | 0.288 | -0.179 | 0.252 | -0.208 | 0.209 | -0.418 | 0.004  |
| PER2     | <i>Per2</i>     | 0.724  | 0.671  | 0.039 | 0.828  | 0.008 | 1.028  | 0.002 | 0.950  | 0.001  |
| PIP5K1A  | <i>Pip5k1a</i>  | 0.105  | -0.069 | 0.723 | 0.277  | 0.121 | -0.003 | 0.988 | -0.009 | 0.960  |
| PIP5K1C  | <i>Pip5k1c</i>  | -0.120 | -0.027 | 0.840 | 0.135  | 0.282 | -0.001 | 0.995 | 0.049  | 0.676  |
| PPARA    | <i>Ppara</i>    | 0.257  | -0.004 | 0.987 | -0.055 | 0.811 | 0.114  | 0.637 | -0.037 | 0.864  |
| PPARG    | <i>Pparg</i>    | -0.012 | 0.249  | 0.483 | 0.534  | 0.113 | 0.024  | 0.947 | -0.111 | 0.729  |
| PPARGC1A | <i>Ppargc1a</i> | 0.806  | -0.172 | 0.624 | 0.249  | 0.452 | 0.623  | 0.071 | 1.064  | 0.001  |
| PPID     | <i>Ppid</i>     | -0.654 | -0.037 | 0.856 | -0.242 | 0.208 | -0.380 | 0.063 | -0.319 | 0.074  |
| RARA     | <i>Rara</i>     | -0.358 | 0.048  | 0.765 | 0.051  | 0.739 | -0.203 | 0.217 | -0.363 | 0.013  |
| RARB     | <i>Rarb</i>     | 0.370  | 0.166  | 0.594 | 0.802  | 0.005 | 0.631  | 0.037 | 0.646  | 0.017  |
| RB1      | <i>Rb1</i>      | -0.315 | 0.052  | 0.757 | -0.338 | 0.039 | -0.251 | 0.146 | -0.217 | 0.153  |
| RBL1     | <i>Rbl1</i>     | -0.021 | 0.645  | 0.161 | 0.934  | 0.032 | 0.086  | 0.858 | -0.011 | 0.980  |
| RBL2     | <i>Rbl2</i>     | 0.562  | 0.004  | 0.983 | -0.245 | 0.127 | 0.051  | 0.762 | 0.252  | 0.090  |
| RELA     | <i>Rela</i>     | -0.300 | -0.150 | 0.371 | -0.134 | 0.396 | -0.409 | 0.016 | -0.292 | 0.049  |
| SDHA     | <i>Sdha</i>     | 0.185  | -0.084 | 0.658 | -0.239 | 0.185 | 0.027  | 0.886 | 0.013  | 0.937  |
| SDHB     | <i>Sdhb</i>     | 0.462  | 0.127  | 0.474 | -0.026 | 0.876 | 0.195  | 0.271 | 0.193  | 0.220  |
| SIRT1    | <i>Sirt1</i>    | 0.214  | 0.016  | 0.938 | 0.066  | 0.732 | -0.119 | 0.560 | 0.299  | 0.092  |
| SIRT2    | <i>Sirt2</i>    | -0.080 | -0.038 | 0.754 | -0.037 | 0.749 | -0.131 | 0.282 | -0.098 | 0.361  |
| SIRT3    | <i>Sirt3</i>    | -0.032 | 0.028  | 0.890 | -0.262 | 0.174 | -0.003 | 0.988 | -0.233 | 0.192  |
| SIRT4    | <i>Sirt4</i>    | -0.653 | 0.037  | 0.882 | -0.299 | 0.216 | -0.638 | 0.017 | -0.499 | 0.030  |
| SIRT5    | <i>Sirt5</i>    | -0.297 | -0.066 | 0.770 | -0.172 | 0.422 | -0.033 | 0.884 | -0.523 | 0.010  |
| SIRT6    | <i>Sirt6</i>    | 0.051  | 0.203  | 0.561 | 0.142  | 0.669 | -0.145 | 0.687 | 0.035  | 0.911  |
| SIRT7    | <i>Sirt7</i>    | -0.501 | -0.184 | 0.248 | -0.317 | 0.037 | -0.286 | 0.074 | -0.304 | 0.031  |
| SLC25A5  | <i>Slc25a5</i>  | 0.732  | 0.046  | 0.803 | 0.165  | 0.344 | 0.368  | 0.044 | 0.478  | 0.003  |
| SMAD7    | <i>Smad7</i>    | 0.052  | 0.229  | 0.338 | 0.123  | 0.588 | 0.431  | 0.069 | -0.247 | 0.254  |
| SREBF1   | <i>Srebf1</i>   | -0.463 | -0.260 | 0.435 | -0.102 | 0.745 | -0.343 | 0.304 | -0.914 | 0.002  |
| SREBF2   | <i>Srebf2</i>   | 0.257  | -0.236 | 0.226 | 0.115  | 0.529 | 0.035  | 0.855 | 0.094  | 0.583  |
| TLE1     | <i>Tle1</i>     | -0.153 | -0.255 | 0.141 | -0.284 | 0.083 | -0.443 | 0.011 | -0.049 | 0.746  |
| TP53     | <i>Trp53</i>    | -0.159 | 0.136  | 0.551 | 0.326  | 0.131 | -0.272 | 0.245 | -0.076 | 0.711  |

|        |               |        |        |       |        |       |        |       |        |        |
|--------|---------------|--------|--------|-------|--------|-------|--------|-------|--------|--------|
| TSC2   | <i>Tsc2</i>   | 0.011  | 0.078  | 0.581 | 0.119  | 0.371 | 0.094  | 0.503 | 0.058  | 0.643  |
| TUBA1A | <i>Tuba1a</i> | -0.226 | -0.288 | 0.545 | 0.102  | 0.818 | -0.756 | 0.124 | -0.799 | 0.062  |
| TUBA1B | <i>Tuba1b</i> | -0.307 | -0.171 | 0.565 | 0.169  | 0.541 | -0.311 | 0.301 | -0.530 | 0.047  |
| TUBA1C | <i>Tuba1c</i> | -0.377 | -0.283 | 0.481 | 0.108  | 0.774 | -0.693 | 0.090 | -0.688 | 0.053  |
| TUBA4A | <i>Tuba4a</i> | -0.595 | -0.502 | 0.077 | -0.665 | 0.014 | -0.803 | 0.005 | -0.597 | 0.016  |
| TUBA8  | <i>Tuba8</i>  | 0.525  | 1.004  | 0.123 | 1.542  | 0.014 | 1.050  | 0.108 | 2.228  | <0.001 |
| UCP2   | <i>Ucp2</i>   | -0.133 | 0.204  | 0.479 | 0.582  | 0.033 | 0.177  | 0.540 | -0.190 | 0.458  |
| WRN    | <i>Wrn</i>    | -0.057 | 0.014  | 0.930 | -0.190 | 0.222 | -0.129 | 0.430 | -0.135 | 0.351  |
| XRCC6  | <i>Xrcc6</i>  | -0.321 | -0.083 | 0.677 | 0.210  | 0.256 | -0.045 | 0.820 | -0.238 | 0.179  |

**Table S5. Expression levels of genes involved in oxidative stress signaling pathway correlated with the increase in calorie restriction (CR) and their gene expression at each level of CR relative to 12h ad libitum intake.**

| Symbol         | Gene Symbol     | 10CR   |        |       | 20CR   |       |        | 30CR  |        |       | 40CR |  |  |
|----------------|-----------------|--------|--------|-------|--------|-------|--------|-------|--------|-------|------|--|--|
|                |                 | r      | logFC  | p     | logFC  | p     | logFC  | p     | logFC  | p     |      |  |  |
| 53BP1          | <i>Trp53bp1</i> | -0.455 | 0.142  | 0.346 | -0.124 | 0.392 | -0.160 | 0.297 | -0.182 | 0.181 |      |  |  |
| AKR            | <i>Akr1a1</i>   | -0.214 | -0.013 | 0.939 | 0.062  | 0.704 | -0.016 | 0.926 | -0.083 | 0.587 |      |  |  |
| AKT            | <i>Akt1</i>     | 0.072  | 0.049  | 0.710 | 0.258  | 0.038 | 0.109  | 0.405 | 0.046  | 0.695 |      |  |  |
| AOX1           | <i>Aox1</i>     | -0.316 | 0.156  | 0.476 | 0.159  | 0.446 | -0.046 | 0.835 | -0.185 | 0.343 |      |  |  |
| ARD1           | <i>Naa10</i>    | 0.052  | -0.251 | 0.082 | -0.064 | 0.633 | -0.025 | 0.861 | 0.004  | 0.977 |      |  |  |
| ARNT           | <i>Arnt</i>     | 0.457  | 0.085  | 0.566 | 0.091  | 0.519 | 0.273  | 0.063 | 0.201  | 0.126 |      |  |  |
| ASK1           | <i>Map3k5</i>   | 0.525  | 0.195  | 0.382 | 0.019  | 0.928 | 0.152  | 0.494 | 0.294  | 0.137 |      |  |  |
| ATF2           | <i>Atf2</i>     | 0.414  | 0.014  | 0.922 | -0.053 | 0.690 | 0.046  | 0.745 | 0.208  | 0.093 |      |  |  |
| ATF4           | <i>Atf4</i>     | -0.141 | -0.061 | 0.700 | -0.055 | 0.714 | -0.034 | 0.830 | -0.161 | 0.253 |      |  |  |
| ATF6           | <i>Atf6</i>     | -0.227 | -0.058 | 0.724 | -0.022 | 0.889 | -0.318 | 0.055 | -0.090 | 0.538 |      |  |  |
| ATM            | <i>Atm</i>      | 0.005  | 0.105  | 0.576 | -0.050 | 0.780 | 0.011  | 0.954 | -0.078 | 0.646 |      |  |  |
| BACH1          | <i>Bach1</i>    | 0.070  | 0.365  | 0.051 | 0.088  | 0.625 | 0.096  | 0.610 | -0.094 | 0.573 |      |  |  |
| BID            | <i>Bid</i>      | -0.364 | -0.040 | 0.835 | -0.201 | 0.275 | -0.184 | 0.345 | -0.408 | 0.019 |      |  |  |
| BIP            | <i>Hspa5</i>    | -0.431 | -0.164 | 0.571 | -0.197 | 0.473 | -0.519 | 0.076 | -0.500 | 0.050 |      |  |  |
| BLM            | <i>Blm</i>      | -0.066 | -0.193 | 0.591 | -0.702 | 0.044 | -0.239 | 0.507 | -0.460 | 0.150 |      |  |  |
| BRCA1          | <i>Brcal</i>    | 0.463  | 0.008  | 0.985 | 0.734  | 0.055 | 0.903  | 0.024 | 1.072  | 0.003 |      |  |  |
| c-Abl          | <i>Abl1</i>     | 0.245  | 0.189  | 0.215 | 0.260  | 0.071 | 0.246  | 0.105 | 0.122  | 0.371 |      |  |  |
| c-Jun          | <i>Jun</i>      | -0.025 | -0.027 | 0.943 | 0.834  | 0.017 | -0.052 | 0.891 | -0.014 | 0.966 |      |  |  |
| c-MAF          | <i>Maf</i>      | 0.259  | 0.052  | 0.748 | 0.210  | 0.175 | 0.236  | 0.146 | 0.176  | 0.223 |      |  |  |
| c-RAF          | <i>Raf1</i>     | -0.299 | -0.165 | 0.253 | -0.215 | 0.116 | -0.278 | 0.055 | -0.247 | 0.052 |      |  |  |
| CALR           | <i>Calr</i>     | -0.616 | -0.562 | 0.065 | -0.444 | 0.122 | -0.902 | 0.003 | -0.638 | 0.016 |      |  |  |
| CASP3          | <i>Casp3</i>    | -0.315 | -0.439 | 0.038 | -0.312 | 0.115 | -0.059 | 0.774 | -0.472 | 0.011 |      |  |  |
| CASP7          | <i>Casp7</i>    | 0.158  | -0.014 | 0.941 | -0.025 | 0.887 | 0.268  | 0.142 | -0.086 | 0.600 |      |  |  |
| CASP9          | <i>Casp9</i>    | -0.257 | -0.279 | 0.109 | -0.157 | 0.336 | -0.164 | 0.344 | -0.471 | 0.002 |      |  |  |
| CAT            | <i>Cat</i>      | -0.805 | -0.091 | 0.700 | -0.470 | 0.039 | -0.487 | 0.043 | -0.668 | 0.001 |      |  |  |
| CBP            | <i>Crebbp</i>   | 0.395  | 0.196  | 0.375 | 0.185  | 0.379 | 0.138  | 0.533 | 0.399  | 0.042 |      |  |  |
| CBR1           | <i>Cbr1</i>     | 0.712  | 0.505  | 0.221 | 1.316  | 0.001 | 1.314  | 0.001 | 1.858  | 0.000 |      |  |  |
| CCT7           | <i>Cct7</i>     | 0.068  | -0.152 | 0.253 | 0.049  | 0.697 | -0.010 | 0.937 | 0.005  | 0.968 |      |  |  |
| CDC25A         | <i>Cdc25a</i>   | 0.175  | 0.154  | 0.598 | 0.426  | 0.116 | 0.273  | 0.348 | 0.376  | 0.144 |      |  |  |
| CDK1           | <i>Cdk1</i>     | -0.132 | 0.564  | 0.430 | 1.514  | 0.025 | 0.445  | 0.538 | -0.742 | 0.267 |      |  |  |
| CDK2           | <i>Cdk2</i>     | 0.027  | 0.145  | 0.420 | -0.176 | 0.315 | 0.068  | 0.709 | -0.078 | 0.631 |      |  |  |
| Chk2           | <i>Chek2</i>    | -0.238 | 0.188  | 0.623 | 0.426  | 0.234 | 0.330  | 0.386 | -0.226 | 0.524 |      |  |  |
| CHOP           | <i>Ddit3</i>    | -0.200 | 0.635  | 0.174 | 0.784  | 0.079 | 0.146  | 0.759 | -0.136 | 0.749 |      |  |  |
| CLPP           | <i>Clpp</i>     | -0.026 | -0.128 | 0.359 | -0.074 | 0.574 | -0.092 | 0.511 | -0.004 | 0.977 |      |  |  |
| CSF2R $\alpha$ | <i>Csf2ra</i>   | -0.123 | 0.121  | 0.738 | 0.439  | 0.197 | -0.017 | 0.962 | -0.735 | 0.026 |      |  |  |
| CSF2R $\beta$  | <i>Csf2rb2</i>  | -0.032 | 0.382  | 0.327 | 0.706  | 0.056 | 0.191  | 0.554 | -0.029 | 0.921 |      |  |  |

|                       |                 |        |        |       |        |       |        |       |        |       |
|-----------------------|-----------------|--------|--------|-------|--------|-------|--------|-------|--------|-------|
| CUL2                  | <i>Cul2</i>     | -0.524 | 0.027  | 0.848 | -0.253 | 0.061 | -0.094 | 0.508 | -0.186 | 0.137 |
| EIF2S1                | <i>Eif2s1</i>   | -0.195 | 0.050  | 0.740 | 0.101  | 0.480 | -0.117 | 0.440 | -0.105 | 0.433 |
| eIF4E                 | <i>Eif4e</i>    | -0.131 | -0.018 | 0.898 | -0.044 | 0.746 | 0.139  | 0.325 | 0.069  | 0.582 |
| eIF2 $\alpha$         | <i>Eif2a</i>    | 0.502  | 0.059  | 0.628 | 0.019  | 0.873 | 0.161  | 0.188 | 0.185  | 0.089 |
| eIF2 $\gamma$         | <i>Eif2s3x</i>  | 0.426  | 0.109  | 0.460 | -0.003 | 0.985 | 0.159  | 0.280 | 0.253  | 0.054 |
| eIF4C                 | <i>Eif1a</i>    | 0.038  | -0.028 | 0.906 | 0.159  | 0.483 | -0.019 | 0.938 | 0.221  | 0.296 |
| ELK-1                 | <i>Elk1</i>     | -0.377 | -0.063 | 0.808 | 0.045  | 0.852 | -0.388 | 0.142 | -0.412 | 0.077 |
| EPHX1                 | <i>Ephx1</i>    | 0.042  | 0.282  | 0.421 | 0.846  | 0.011 | 0.418  | 0.232 | 0.633  | 0.044 |
| ERK5                  | <i>Mapk7</i>    | -0.087 | 0.035  | 0.909 | 0.106  | 0.709 | -0.127 | 0.682 | -0.082 | 0.765 |
| ERP29                 | <i>Erp29</i>    | -0.508 | -0.227 | 0.173 | -0.084 | 0.593 | -0.293 | 0.080 | -0.313 | 0.033 |
| FKBP5                 | <i>Fkbp5</i>    | 0.780  | 0.438  | 0.411 | 1.267  | 0.013 | 1.575  | 0.003 | 2.180  | 0.000 |
| FMO1                  | <i>Fmo1</i>     | 0.818  | 0.439  | 0.149 | 0.724  | 0.012 | 1.206  | 0.000 | 1.099  | 0.000 |
| FTH1                  | <i>Fth1</i>     | 0.532  | 0.184  | 0.319 | 0.283  | 0.108 | 0.326  | 0.077 | 0.409  | 0.013 |
| GADD34                | <i>Ppp1r15a</i> | 0.191  | 0.049  | 0.799 | 0.170  | 0.348 | -0.004 | 0.984 | 0.139  | 0.416 |
| GCLC                  | <i>Gclc</i>     | -0.388 | 0.246  | 0.368 | 0.017  | 0.948 | -0.571 | 0.041 | -0.504 | 0.038 |
| GCLM                  | <i>Gclm</i>     | 0.003  | 0.221  | 0.152 | 0.332  | 0.024 | 0.131  | 0.396 | 0.160  | 0.245 |
| GCN2                  | <i>Eif2ak4</i>  | 0.387  | -0.003 | 0.989 | 0.084  | 0.635 | 0.139  | 0.454 | 0.300  | 0.067 |
| gp91                  | <i>Cybb</i>     | -0.071 | 0.217  | 0.534 | 0.732  | 0.027 | 0.021  | 0.951 | -0.483 | 0.120 |
| GRB2                  | <i>Grb2</i>     | -0.346 | -0.098 | 0.434 | 0.003  | 0.982 | -0.104 | 0.405 | -0.123 | 0.266 |
| GRP94                 | <i>Hsp90b1</i>  | -0.486 | -0.287 | 0.160 | -0.337 | 0.082 | -0.370 | 0.071 | -0.302 | 0.092 |
| GSK3 $\beta$          | <i>Gsk3b</i>    | 0.117  | 0.144  | 0.273 | 0.063  | 0.614 | 0.006  | 0.966 | 0.095  | 0.416 |
| GSR                   | <i>Gsr</i>      | -0.153 | 0.054  | 0.710 | 0.121  | 0.376 | -0.187 | 0.198 | -0.034 | 0.788 |
| H2AX                  | <i>H2afx</i>    | -0.111 | 0.212  | 0.396 | 0.289  | 0.220 | -0.184 | 0.479 | 0.144  | 0.523 |
| HERPUD1               | <i>Herpud1</i>  | 0.184  | -0.120 | 0.645 | 0.004  | 0.987 | -0.025 | 0.922 | 0.216  | 0.347 |
| HIF1 $\alpha$         | <i>Hif1a</i>    | 0.060  | 0.008  | 0.954 | -0.089 | 0.502 | -0.113 | 0.421 | -0.054 | 0.661 |
| HIP2                  | <i>Ube2k</i>    | 0.058  | -0.050 | 0.678 | -0.039 | 0.730 | -0.006 | 0.963 | 0.124  | 0.245 |
| HO-1                  | <i>Hmox1</i>    | 0.117  | -0.006 | 0.985 | 0.739  | 0.020 | -0.080 | 0.813 | 0.241  | 0.418 |
| HP1                   | <i>Cbx5</i>     | 0.205  | 0.255  | 0.067 | 0.183  | 0.167 | 0.177  | 0.204 | 0.062  | 0.620 |
| HRI                   | <i>Eif2ak1</i>  | 0.151  | -0.016 | 0.903 | -0.161 | 0.192 | -0.118 | 0.363 | -0.002 | 0.989 |
| HSP90                 | <i>Hsp90aa1</i> | -0.423 | 0.055  | 0.820 | 0.124  | 0.588 | -0.203 | 0.404 | -0.150 | 0.483 |
| I $\kappa$ B $\alpha$ | <i>Nfkbia</i>   | 0.575  | 0.116  | 0.557 | 0.074  | 0.695 | 0.160  | 0.418 | 0.462  | 0.008 |
| ICAM1                 | <i>Icam1</i>    | -0.056 | -0.036 | 0.914 | 0.411  | 0.194 | 0.081  | 0.809 | -0.085 | 0.775 |
| ICSBP                 | <i>Irf8</i>     | -0.080 | 0.320  | 0.324 | 0.472  | 0.125 | 0.093  | 0.776 | -0.458 | 0.121 |
| INSR                  | <i>Insr</i>     | 0.507  | 0.106  | 0.572 | -0.076 | 0.670 | 0.153  | 0.414 | 0.245  | 0.141 |
| IRE1                  | <i>Ern1</i>     | -0.184 | -0.033 | 0.895 | -0.344 | 0.154 | -0.466 | 0.069 | -0.009 | 0.969 |
| IRF-1                 | <i>Irf1</i>     | -0.132 | -0.040 | 0.851 | -0.090 | 0.656 | -0.261 | 0.225 | -0.208 | 0.269 |
| JAB1                  | <i>Cops5</i>    | 0.151  | -0.080 | 0.547 | -0.069 | 0.583 | 0.044  | 0.739 | -0.008 | 0.945 |
| JAK2                  | <i>Jak2</i>     | -0.138 | 0.054  | 0.707 | -0.132 | 0.337 | -0.130 | 0.368 | -0.177 | 0.167 |
| JIK                   | <i>Taok3</i>    | 0.580  | 0.045  | 0.804 | 0.040  | 0.813 | 0.101  | 0.571 | 0.349  | 0.028 |
| JNK1                  | <i>Mapk8</i>    | 0.392  | 0.183  | 0.239 | 0.051  | 0.730 | 0.211  | 0.173 | 0.312  | 0.023 |
| KAP-1                 | <i>Trim28</i>   | 0.142  | -0.072 | 0.661 | 0.024  | 0.880 | 0.007  | 0.965 | 0.005  | 0.974 |
| MDC1                  | <i>Mdc1</i>     | 0.099  | -0.010 | 0.960 | 0.079  | 0.672 | 0.082  | 0.680 | 0.117  | 0.506 |
| MDM2                  | <i>Mdm2</i>     | 0.001  | 0.116  | 0.521 | 0.217  | 0.203 | 0.048  | 0.791 | 0.120  | 0.456 |
| MDMX                  | <i>Mdm4</i>     | 0.309  | 0.298  | 0.281 | 0.279  | 0.289 | 0.337  | 0.222 | 0.311  | 0.207 |
| MEK1                  | <i>Map2k1</i>   | -0.493 | -0.174 | 0.283 | -0.122 | 0.426 | -0.182 | 0.262 | -0.359 | 0.012 |
| MEK5                  | <i>Map2k5</i>   | 0.099  | -0.098 | 0.545 | 0.004  | 0.978 | -0.200 | 0.220 | -0.058 | 0.687 |
| MEKK                  | <i>Map3k1</i>   | -0.017 | 0.233  | 0.317 | 0.167  | 0.452 | -0.016 | 0.946 | 0.145  | 0.486 |
| MRE11                 | <i>Mre11a</i>   | 0.072  | 0.142  | 0.625 | 0.123  | 0.657 | -0.236 | 0.435 | 0.075  | 0.773 |
| MRP1                  | <i>Abcc1</i>    | -0.030 | 0.317  | 0.441 | 0.360  | 0.357 | -0.148 | 0.727 | -0.369 | 0.329 |
| MRP2                  | <i>Abcc2</i>    | 0.241  | 0.209  | 0.333 | 0.190  | 0.355 | 0.132  | 0.543 | 0.139  | 0.470 |
| MRP4                  | <i>Abcc4</i>    | 0.073  | 1.657  | 0.007 | 2.157  | 0.000 | 0.988  | 0.108 | 1.217  | 0.030 |
| NBS1                  | <i>Nbn</i>      | 0.141  | 0.014  | 0.925 | -0.089 | 0.534 | -0.079 | 0.604 | 0.024  | 0.857 |
| NRF2                  | <i>Nfe2l2</i>   | -0.139 | -0.035 | 0.828 | -0.105 | 0.491 | -0.146 | 0.365 | -0.057 | 0.687 |

|         |                 |        |        |       |        |       |        |       |        |       |
|---------|-----------------|--------|--------|-------|--------|-------|--------|-------|--------|-------|
| NRPB    | <i>Enc1</i>     | 0.455  | 0.275  | 0.558 | 1.004  | 0.024 | 0.988  | 0.033 | 1.406  | 0.001 |
| p21CIP1 | <i>Cdkn1a</i>   | 0.055  | 0.775  | 0.288 | 1.702  | 0.016 | -0.253 | 0.736 | 1.225  | 0.066 |
| p22phox | <i>Cyba</i>     | -0.101 | 0.115  | 0.767 | 0.647  | 0.075 | 0.062  | 0.874 | -0.394 | 0.258 |
| p38MAPK | <i>Mapk14</i>   | 0.614  | 0.219  | 0.157 | 0.243  | 0.099 | 0.306  | 0.048 | 0.436  | 0.002 |
| p40phox | <i>Ncf4</i>     | -0.231 | -0.210 | 0.679 | 0.161  | 0.733 | -0.169 | 0.739 | -1.054 | 0.025 |
| p47phox | <i>Ncf1</i>     | -0.150 | 0.301  | 0.338 | 0.621  | 0.036 | -0.082 | 0.799 | -0.444 | 0.123 |
| p53     | <i>Trp53</i>    | -0.159 | 0.136  | 0.551 | 0.326  | 0.131 | -0.272 | 0.245 | -0.076 | 0.711 |
| P58IPK  | <i>Dnajc3</i>   | -0.105 | -0.070 | 0.703 | -0.144 | 0.409 | -0.119 | 0.518 | 0.083  | 0.609 |
| p67phox | <i>Ncf2</i>     | -0.112 | -0.069 | 0.857 | 0.271  | 0.447 | -0.019 | 0.960 | -0.427 | 0.210 |
| PABP    | <i>Pabpc1</i>   | -0.272 | 0.045  | 0.775 | 0.011  | 0.944 | -0.191 | 0.230 | -0.180 | 0.200 |
| PAI-1   | <i>Serpine1</i> | 0.039  | -0.037 | 0.954 | 0.875  | 0.140 | 0.254  | 0.687 | -0.365 | 0.521 |
| PKD1    | <i>Pdk1</i>     | 0.279  | 0.092  | 0.564 | 0.054  | 0.723 | -0.018 | 0.910 | 0.220  | 0.120 |
| PERK    | <i>Eif2ak3</i>  | -0.206 | 0.109  | 0.663 | -0.187 | 0.438 | -0.587 | 0.024 | -0.329 | 0.145 |
| PKCβ    | <i>Prkcb</i>    | -0.177 | -0.169 | 0.508 | 0.129  | 0.589 | -0.223 | 0.385 | -0.648 | 0.005 |
| PKR     | <i>Eif2ak2</i>  | -0.007 | 0.058  | 0.719 | -0.039 | 0.801 | 0.057  | 0.727 | 0.084  | 0.559 |
| PMF-1   | <i>Pmf1</i>     | 0.453  | -0.372 | 0.063 | -0.128 | 0.491 | 0.074  | 0.702 | 0.211  | 0.221 |
| PPARα   | <i>Ppara</i>    | 0.257  | -0.004 | 0.987 | -0.055 | 0.811 | 0.114  | 0.637 | -0.037 | 0.864 |
| PPIB    | <i>Ppib</i>     | -0.602 | -0.394 | 0.099 | -0.258 | 0.252 | -0.507 | 0.034 | -0.526 | 0.012 |
| PRDX1   | <i>Prdx1</i>    | -0.201 | -0.130 | 0.457 | -0.079 | 0.632 | -0.058 | 0.738 | -0.078 | 0.610 |
| Rac1    | <i>Rac1</i>     | -0.077 | -0.032 | 0.801 | -0.003 | 0.981 | -0.037 | 0.773 | -0.059 | 0.604 |
| Rad50   | <i>Rad50</i>    | 0.066  | 0.028  | 0.870 | 0.108  | 0.508 | 0.063  | 0.714 | -0.009 | 0.956 |
| RAD9    | <i>Rad9a</i>    | 0.112  | 0.093  | 0.512 | 0.175  | 0.191 | 0.048  | 0.735 | 0.033  | 0.792 |
| REF1    | <i>Apex1</i>    | -0.363 | -0.469 | 0.021 | -0.188 | 0.323 | -0.298 | 0.140 | -0.469 | 0.009 |
| SHC     | <i>Shc1</i>     | -0.180 | -0.091 | 0.512 | 0.026  | 0.845 | -0.072 | 0.607 | -0.258 | 0.036 |
| SIRPα   | <i>Sirpa</i>    | -0.184 | 0.119  | 0.738 | 0.451  | 0.180 | -0.253 | 0.481 | -0.597 | 0.059 |
| SP1     | <i>Sp1</i>      | -0.145 | -0.081 | 0.528 | -0.179 | 0.146 | -0.215 | 0.100 | -0.138 | 0.228 |
| SQSTM1  | <i>Sqstm1</i>   | -0.287 | 0.000  | 0.999 | 0.200  | 0.481 | -0.483 | 0.110 | -0.475 | 0.072 |
| SR-BI   | <i>Scarb1</i>   | 0.155  | -0.154 | 0.397 | 0.015  | 0.930 | -0.146 | 0.422 | 0.125  | 0.438 |
| SRC-1   | <i>Ncoa1</i>    | 0.269  | -0.018 | 0.903 | -0.090 | 0.507 | 0.104  | 0.465 | 0.194  | 0.123 |
| STAT1   | <i>Stat1</i>    | -0.217 | 0.044  | 0.866 | 0.120  | 0.631 | -0.417 | 0.116 | -0.336 | 0.148 |
| STIP1   | <i>Stip1</i>    | -0.520 | -0.131 | 0.496 | -0.084 | 0.646 | -0.361 | 0.064 | -0.289 | 0.089 |
| TCEB1   | <i>Tceb1</i>    | -0.252 | 0.119  | 0.519 | 0.005  | 0.978 | 0.076  | 0.682 | -0.016 | 0.922 |
| TDP1    | <i>Tdp1</i>     | -0.089 | -0.083 | 0.827 | 0.200  | 0.569 | 0.005  | 0.990 | -0.327 | 0.339 |
| TLR4    | <i>Tlr4</i>     | -0.006 | -0.007 | 0.979 | 0.146  | 0.576 | 0.044  | 0.875 | 0.005  | 0.986 |
| TPA     | <i>Plat</i>     | -0.148 | 0.369  | 0.658 | 0.767  | 0.334 | -1.024 | 0.248 | -1.440 | 0.064 |
| TRAF2   | <i>Traf2</i>    | -0.004 | 0.326  | 0.163 | 0.400  | 0.071 | 0.112  | 0.638 | 0.206  | 0.330 |
| TRXR1   | <i>Txnrd1</i>   | -0.057 | 0.190  | 0.296 | 0.174  | 0.314 | -0.053 | 0.773 | 0.134  | 0.405 |
| TXN     | <i>Txn1</i>     | -0.298 | -0.127 | 0.418 | -0.351 | 0.019 | -0.176 | 0.265 | -0.196 | 0.157 |
| UB2R1   | <i>Cdc34</i>    | -0.111 | 0.082  | 0.607 | 0.241  | 0.108 | -0.105 | 0.512 | 0.053  | 0.707 |
| UbcM2   | <i>Ube2e3</i>   | 0.477  | -0.026 | 0.855 | 0.063  | 0.640 | 0.154  | 0.275 | 0.241  | 0.054 |
| USP14   | <i>Usp14</i>    | -0.191 | -0.044 | 0.732 | -0.114 | 0.352 | -0.041 | 0.750 | -0.039 | 0.734 |
| VCAM1   | <i>Vcam1</i>    | 0.456  | 0.122  | 0.711 | 0.847  | 0.007 | 0.542  | 0.097 | 0.639  | 0.029 |
| VCP     | <i>Vcp</i>      | -0.549 | -0.369 | 0.088 | -0.321 | 0.116 | -0.538 | 0.013 | -0.542 | 0.004 |
| VHL     | <i>Vhl</i>      | -0.256 | 0.052  | 0.835 | 0.116  | 0.621 | -0.004 | 0.986 | -0.045 | 0.838 |
| XBP1    | <i>Xbp1</i>     | -0.571 | -0.085 | 0.732 | -0.283 | 0.230 | -0.429 | 0.087 | -0.659 | 0.003 |

**Table S6. Expression levels of genes involved in reproduction signaling pathway correlated with the increase in calorie restriction (CR) and their gene expression at each level of CR relative to 12h ad libitum intake.**

| Symbol    | Gene Symbol   | r     | 10CR   |       | 20CR   |       | 30CR   |       | 40CR   |       |
|-----------|---------------|-------|--------|-------|--------|-------|--------|-------|--------|-------|
|           |               |       | logF C | p     | logF C | p     | logF C | p     | logF C | p     |
| β-catenin | <i>Ctnnb1</i> | 0.363 | 0.100  | 0.550 | 0.083  | 0.601 | 0.220  | 0.190 | 0.268  | 0.069 |
| ACOX1     | <i>Acox1</i>  | 0.368 | 0.052  | 0.793 | 0.115  | 0.541 | 0.242  | 0.221 | 0.079  | 0.653 |
| AHR       | <i>Ahr</i>    | 0.468 | 0.012  | 0.957 | 0.117  | 0.564 | 0.293  | 0.166 | 0.422  | 0.025 |
| AKT1      | <i>Akt1</i>   | 0.072 | 0.049  | 0.710 | 0.258  | 0.038 | 0.109  | 0.405 | 0.046  | 0.695 |
| Apaf1     | <i>Apaf1</i>  | 0.020 | 0.141  | 0.693 | 0.775  | 0.018 | 0.373  | 0.290 | 0.037  | 0.908 |
| ASPH      | <i>Asph</i>   | 0.207 | 0.026  | 0.858 | 0.093  | 0.499 | 0.155  | 0.287 | 0.043  | 0.737 |
| ATF2      | <i>Atf2</i>   | 0.414 | 0.014  | 0.922 | 0.053  | 0.690 | 0.046  | 0.745 | 0.208  | 0.093 |
| ATM       | <i>Atm</i>    | 0.005 | 0.105  | 0.576 | 0.050  | 0.780 | 0.011  | 0.954 | 0.078  | 0.646 |
| ATR       | <i>Atr</i>    | 0.422 | 0.237  | 0.206 | 0.302  | 0.089 | 0.340  | 0.068 | 0.422  | 0.011 |
| AXIN      | <i>Axin1</i>  | 0.117 | 0.146  | 0.373 | 0.029  | 0.851 | 0.154  | 0.349 | 0.088  | 0.540 |
| BAX       | <i>Bax</i>    | 0.138 | 0.095  | 0.696 | 0.118  | 0.604 | 0.205  | 0.403 | 0.219  | 0.312 |
| Bcl-2     | <i>Bcl2</i>   | 0.221 | 0.665  | 0.077 | 0.396  | 0.274 | 0.449  | 0.265 | 0.401  | 0.256 |
| Bcl-xL    | <i>Bcl2l1</i> | 0.005 | 0.134  | 0.473 | 0.224  | 0.205 | 0.077  | 0.684 | 0.065  | 0.695 |
| Brcal     | <i>Brcal</i>  | 0.463 | 0.008  | 0.985 | 0.734  | 0.055 | 0.903  | 0.024 | 1.072  | 0.003 |
| c-Jun     | <i>Jun</i>    | 0.025 | 0.027  | 0.943 | 0.834  | 0.017 | 0.052  | 0.891 | 0.014  | 0.966 |
| c-Raf     | <i>Raf1</i>   | 0.299 | 0.165  | 0.253 | 0.215  | 0.116 | 0.278  | 0.055 | 0.247  | 0.052 |
| CABC1     | <i>Adck3</i>  | 0.158 | 0.780  | 0.025 | 0.975  | 0.003 | 0.615  | 0.075 | 0.145  | 0.628 |
| Caspase 6 | <i>Casp6</i>  | 0.263 | 0.210  | 0.243 | 0.154  | 0.366 | 0.177  | 0.315 | 0.024  | 0.881 |
| CDK2      | <i>Cdk2</i>   | 0.027 | 0.145  | 0.420 | 0.176  | 0.315 | 0.068  | 0.709 | 0.078  | 0.631 |
| CDK4      | <i>Cdk4</i>   | 0.195 | 0.021  | 0.904 | 0.111  | 0.508 | 0.094  | 0.595 | 0.288  | 0.068 |
| CEBPA     | <i>Cebpa</i>  | 0.650 | 0.363  | 0.155 | 0.441  | 0.069 | 0.512  | 0.046 | 0.817  | 0.000 |
| CGN       | <i>Cgn</i>    | 0.260 | 0.382  | 0.041 | 0.284  | 0.105 | 0.443  | 0.018 | 0.246  | 0.133 |
| Chk2      | <i>Chek2</i>  | 0.238 | 0.188  | 0.623 | 0.426  | 0.234 | 0.330  | 0.386 | 0.226  | 0.524 |
| CK1δ      | <i>Csnk1d</i> | 0.154 | 0.057  | 0.648 | 0.067  | 0.570 | 0.100  | 0.426 | 0.148  | 0.179 |
| CTNNγ     | <i>Jup</i>    | 0.163 | 0.203  | 0.247 | 0.307  | 0.062 | 0.136  | 0.433 | 0.171  | 0.266 |
| CyclinG   | <i>Ccng1</i>  | 0.121 | 0.068  | 0.665 | 0.035  | 0.813 | 0.079  | 0.616 | 0.107  | 0.447 |
| CyclinK   | <i>Ccnk</i>   | 0.409 | 0.082  | 0.576 | 0.076  | 0.579 | 0.004  | 0.976 | 0.138  | 0.282 |
| Cyclin D1 | <i>Ccnd1</i>  | 0.103 | 0.588  | 0.224 | 1.520  | 0.001 | 1.324  | 0.006 | 0.226  | 0.601 |
| Cyclin D2 | <i>Ccnd2</i>  | -     | 0.264  | 0.353 | 0.128  | 0.637 | -      | 0.555 | -      | 0.026 |



|            |               |       |       |       |       |       |       |       |       |       |
|------------|---------------|-------|-------|-------|-------|-------|-------|-------|-------|-------|
|            |               | 0.259 |       |       |       |       | 0.170 |       | 0.571 |       |
| DLG1       | <i>Dlg1</i>   | 0.413 | 0.076 | 0.588 | 0.139 | 0.300 | 0.238 | 0.093 | 0.373 | 0.003 |
| DNA-PK     | <i>Prkdc</i>  | 0.237 | 0.157 | 0.479 | 0.085 | 0.682 | 0.346 | 0.126 | 0.229 | 0.246 |
| DRAM       | <i>Dram1</i>  | 0.084 | 0.729 | 0.187 | 0.178 | 0.718 | 0.064 | 0.903 | 0.332 | 0.482 |
| E-Cadherin | <i>Cdh1</i>   | 0.251 | 0.025 | 0.945 | 0.151 | 0.656 | 0.722 | 0.048 | 0.405 | 0.200 |
| E2F1       | <i>E2f1</i>   | 0.296 | 0.182 | 0.629 | 0.681 | 0.050 | 0.128 | 0.741 | 0.441 | 0.210 |
| Elk-1      | <i>Elk1</i>   | 0.377 | 0.063 | 0.808 | 0.045 | 0.852 | 0.388 | 0.142 | 0.412 | 0.077 |
| FAK        | <i>Ptk2</i>   | 0.093 | 0.133 | 0.357 | 0.032 | 0.819 | 0.038 | 0.797 | 0.021 | 0.873 |
| FAS        | <i>Fas</i>    | 0.107 | 0.015 | 0.932 | 0.319 | 0.043 | 0.096 | 0.570 | 0.187 | 0.212 |
| FASN       | <i>Fasn</i>   | 0.367 | 1.511 | 0.008 | 1.297 | 0.014 | 0.592 | 0.280 | 1.562 | 0.001 |
| FST        | <i>Fst</i>    | 0.524 | 1.391 | 0.008 | 1.190 | 0.015 | 1.540 | 0.004 | 1.968 | 0.000 |
| G6PC       | <i>G6pc</i>   | 0.183 | 0.646 | 0.195 | 0.285 | 0.543 | 0.167 | 0.733 | 0.657 | 0.133 |
| GPD1       | <i>Gpd1</i>   | 0.415 | 0.191 | 0.434 | 0.330 | 0.155 | 0.473 | 0.055 | 0.071 | 0.740 |
| Gsk3β      | <i>Gsk3b</i>  | 0.117 | 0.144 | 0.273 | 0.063 | 0.614 | 0.006 | 0.966 | 0.095 | 0.416 |
| HDAC       | <i>Hdac1</i>  | 0.330 | 0.097 | 0.537 | 0.041 | 0.785 | 0.024 | 0.878 | 0.379 | 0.007 |
| HDAC9      | <i>Hdac9</i>  | 0.109 | 0.090 | 0.845 | 0.113 | 0.790 | 0.030 | 0.948 | 0.550 | 0.200 |
| HIF1A      | <i>Hif1a</i>  | 0.060 | 0.008 | 0.954 | 0.089 | 0.502 | 0.113 | 0.421 | 0.054 | 0.661 |
| HIPK2      | <i>Hipk2</i>  | 0.317 | 0.359 | 0.141 | 0.016 | 0.945 | 0.068 | 0.782 | 0.299 | 0.172 |
| HMGN1      | <i>Hmg1</i>   | 0.202 | 0.053 | 0.698 | 0.013 | 0.920 | 0.185 | 0.170 | 0.029 | 0.810 |
| HTT        | <i>Htt</i>    | 0.338 | 0.107 | 0.582 | 0.185 | 0.315 | 0.267 | 0.174 | 0.313 | 0.070 |
| IGF2       | <i>Igf2</i>   | 0.067 | 0.383 | 0.800 | 7.505 | 0.000 | 0.764 | 0.613 | 0.486 | 0.720 |
| IGFBP1     | <i>Igfbp1</i> | 0.377 | 0.089 | 0.878 | 1.118 | 0.042 | 0.318 | 0.581 | 1.199 | 0.022 |
| ILK        | <i>Ilk</i>    | 0.121 | 0.016 | 0.904 | 0.076 | 0.539 | 0.169 | 0.197 | 0.152 | 0.188 |
| INSR       | <i>Insr</i>   | 0.507 | 0.106 | 0.572 | 0.076 | 0.670 | 0.153 | 0.414 | 0.245 | 0.141 |
| JMY        | <i>Jmy</i>    | 0.286 | 0.096 | 0.554 | 0.006 | 0.968 | 0.056 | 0.731 | 0.257 | 0.072 |
| JNK1       | <i>Mapk8</i>  | 0.392 | 0.183 | 0.239 | 0.051 | 0.730 | 0.211 | 0.173 | 0.312 | 0.023 |
| LEPR       | <i>Lepr</i>   | 0.686 | 0.201 | 0.680 | 0.594 | 0.199 | 1.115 | 0.021 | 1.526 | 0.001 |
| MDM2       | <i>Mdm2</i>   | 0.001 | 0.116 | 0.521 | 0.217 | 0.203 | 0.048 | 0.791 | 0.120 | 0.456 |
| MDM4       | <i>Mdm4</i>   | 0.309 | 0.298 | 0.281 | 0.279 | 0.289 | 0.337 | 0.222 | 0.311 | 0.207 |
| MKK3       | <i>Map2k3</i> | 0.044 | 0.262 | 0.106 | 0.221 | 0.152 | 0.193 | 0.233 | 0.038 | 0.792 |
| MLXIPL     | <i>Mlxipl</i> | 0.493 | 0.236 | 0.412 | 0.743 | 0.007 | 0.638 | 0.028 | 0.520 | 0.040 |
| Mup20      | <i>Mup20</i>  | 0.884 | 1.845 | 0.255 | 6.244 | 0.001 | 6.679 | 0.001 | 7.905 | 0.000 |
| NFE2L2     | <i>Nfe2l2</i> | 0.139 | 0.035 | 0.828 | 0.105 | 0.491 | 0.146 | 0.365 | 0.057 | 0.687 |

|          |                 |       |       |       |       |       |       |       |       |       |
|----------|-----------------|-------|-------|-------|-------|-------|-------|-------|-------|-------|
| NR1I2    | <i>Nr1i2</i>    | 0.805 | 0.306 | 0.204 | 0.498 | 0.030 | 0.782 | 0.001 | 0.783 | 0.000 |
| NR2C2    | <i>Nr2c2</i>    | 0.443 | 0.051 | 0.775 | 0.013 | 0.937 | 0.082 | 0.641 | 0.216 | 0.166 |
| NRF1     | <i>Nrf1</i>     | 0.120 | 0.128 | 0.471 | 0.168 | 0.317 | 0.152 | 0.394 | 0.087 | 0.581 |
| OCLN     | <i>Ocln</i>     | 0.248 | 0.402 | 0.104 | 0.181 | 0.434 | 0.173 | 0.478 | 0.224 | 0.295 |
| p130CAS  | <i>Bcar1</i>    | 0.613 | 0.188 | 0.434 | 0.271 | 0.235 | 0.570 | 0.020 | 0.893 | 0.000 |
| p21Cip1  | <i>Cdkn1a</i>   | 0.055 | 0.775 | 0.288 | 1.702 | 0.016 | 0.253 | 0.736 | 1.225 | 0.066 |
| p300     | <i>Ep300</i>    | 0.476 | 0.129 | 0.501 | 0.097 | 0.593 | 0.087 | 0.650 | 0.432 | 0.011 |
| p38 MAPK | <i>Mapk14</i>   | 0.614 | 0.219 | 0.157 | 0.243 | 0.099 | 0.306 | 0.048 | 0.436 | 0.002 |
| p48      | <i>Sti3</i>     | 0.267 | 0.042 | 0.777 | 0.071 | 0.614 | 0.130 | 0.384 | 0.103 | 0.432 |
| p53      | <i>Trp53</i>    | 0.159 | 0.136 | 0.551 | 0.326 | 0.131 | 0.272 | 0.245 | 0.076 | 0.711 |
| p53R2    | <i>Rrm2b</i>    | 0.386 | 0.497 | 0.054 | 0.215 | 0.390 | 0.496 | 0.055 | 0.556 | 0.016 |
| PAI-1    | <i>Serpine2</i> | 0.614 | 0.181 | 0.579 | 0.932 | 0.003 | 1.420 | 0.000 | 0.789 | 0.007 |
| PALS2    | <i>Mpp6</i>     | 0.277 | 0.094 | 0.606 | 0.002 | 0.991 | 0.192 | 0.289 | 0.221 | 0.169 |
| PCAF     | <i>Kat2b</i>    | 0.424 | 0.184 | 0.354 | 0.120 | 0.527 | 0.198 | 0.319 | 0.240 | 0.174 |
| PCK1     | <i>Pck1</i>     | 0.677 | 0.004 | 0.990 | 0.424 | 0.199 | 0.514 | 0.137 | 0.943 | 0.003 |
| PCNA     | <i>Pcna</i>     | 0.228 | 0.037 | 0.808 | 0.208 | 0.143 | 0.245 | 0.102 | 0.207 | 0.122 |
| PDK1     | <i>Pdpk1</i>    | 0.279 | 0.092 | 0.564 | 0.054 | 0.723 | 0.018 | 0.910 | 0.220 | 0.120 |
| PERP     | <i>Perp</i>     | 0.317 | 0.055 | 0.761 | 0.129 | 0.450 | 0.106 | 0.551 | 0.236 | 0.136 |
| PIAS1    | <i>Pias1</i>    | 0.270 | 0.171 | 0.269 | 0.129 | 0.375 | 0.044 | 0.774 | 0.151 | 0.259 |
| PILT     | <i>Tjap1</i>    | 0.084 | 0.299 | 0.309 | 0.358 | 0.197 | 0.289 | 0.352 | 0.097 | 0.715 |
| PML      | <i>Pml</i>      | 0.243 | 0.181 | 0.390 | 0.134 | 0.500 | 0.160 | 0.448 | 0.263 | 0.157 |
| PPARA    | <i>Ppara</i>    | 0.257 | 0.004 | 0.987 | 0.055 | 0.811 | 0.114 | 0.637 | 0.037 | 0.864 |
| PPARG    | <i>Pparg</i>    | 0.012 | 0.249 | 0.483 | 0.534 | 0.113 | 0.024 | 0.947 | 0.111 | 0.729 |
| PPARGC1A | <i>Ppargc1a</i> | 0.806 | 0.172 | 0.624 | 0.249 | 0.452 | 0.623 | 0.071 | 1.064 | 0.001 |
| PTEN     | <i>Pten</i>     | 0.131 | 0.001 | 0.995 | 0.097 | 0.595 | 0.069 | 0.717 | 0.041 | 0.807 |
| PUMA     | <i>Bbc3</i>     | 0.311 | 0.894 | 0.013 | 0.599 | 0.071 | 0.364 | 0.293 | 0.659 | 0.033 |
| PXN      | <i>Pxn</i>      | 0.248 | 0.126 | 0.367 | 0.059 | 0.652 | 0.112 | 0.424 | 0.054 | 0.661 |
| Rac      | <i>Rac1</i>     | 0.077 | 0.032 | 0.801 | 0.003 | 0.981 | 0.037 | 0.773 | 0.059 | 0.604 |
| Rb       | <i>Rb1</i>      | 0.315 | 0.052 | 0.757 | 0.338 | 0.039 | 0.251 | 0.146 | 0.217 | 0.153 |
| RORA     | <i>Rora</i>     | 0.240 | 0.063 | 0.759 | 0.141 | 0.470 | 0.063 | 0.758 | 0.054 | 0.768 |
| RORC     | <i>Rorc</i>     | 0.817 | 0.610 | 0.053 | 0.696 | 0.021 | 1.162 | 0.000 | 1.088 | 0.000 |
| SCD      | <i>Scd1</i>     | 0.123 | 0.561 | 0.125 | 0.670 | 0.053 | 0.278 | 0.444 | 0.438 | 0.169 |
| SCO2     | <i>Sco2</i>     | 0.082 | -     | 0.714 | 0.026 | 0.942 | 0.427 | 0.251 | 0.310 | 0.354 |

|          |                  |       | 0.142 |       |       |       |       |       |       |       |
|----------|------------------|-------|-------|-------|-------|-------|-------|-------|-------|-------|
| SEPP1    | <i>Sepp1</i>     | 0.386 | 0.167 | 0.376 | 0.116 | 0.521 | 0.284 | 0.133 | 0.247 | 0.141 |
| SIRT     | <i>Sirt1</i>     | 0.214 | 0.016 | 0.938 | 0.066 | 0.732 | 0.119 | 0.560 | 0.299 | 0.092 |
| Slug     | <i>Snai2</i>     | 0.429 | 0.004 | 0.988 | 0.037 | 0.889 | 0.139 | 0.617 | 0.319 | 0.194 |
| SMARCB1  | <i>Smarcb1</i>   | 0.320 | 0.075 | 0.759 | 0.152 | 0.507 | 0.226 | 0.358 | 0.477 | 0.029 |
| STAG1    | <i>Stag1</i>     | 0.180 | 0.023 | 0.880 | 0.157 | 0.274 | 0.048 | 0.750 | 0.153 | 0.247 |
| STAT3    | <i>Stat3</i>     | 0.227 | 0.364 | 0.151 | 0.348 | 0.142 | 0.043 | 0.862 | 0.271 | 0.223 |
| Survivin | <i>Birc5</i>     | 0.039 | 0.321 | 0.580 | 1.432 | 0.008 | 0.403 | 0.507 | 0.053 | 0.920 |
| SYMPK    | <i>Sympk</i>     | 0.080 | 0.071 | 0.652 | 0.061 | 0.681 | 0.018 | 0.910 | 0.115 | 0.408 |
| Teap     | <i>Trp53inp1</i> | 0.171 | 0.270 | 0.336 | 0.427 | 0.110 | 0.359 | 0.200 | 0.659 | 0.009 |
| TGF-β    | <i>Tgfb3</i>     | 0.224 | 0.037 | 0.953 | 0.029 | 0.961 | 0.691 | 0.296 | 1.709 | 0.004 |
| TGFBR3   | <i>Tgfb3</i>     | 0.436 | 0.114 | 0.564 | 0.108 | 0.570 | 0.104 | 0.600 | 0.170 | 0.332 |
| THRA     | <i>Thra</i>      | 0.214 | 0.118 | 0.561 | 0.259 | 0.173 | 0.088 | 0.664 | 0.215 | 0.230 |
| TNFR     | <i>Tnfrsf1a</i>  | 0.049 | 0.297 | 0.103 | 0.063 | 0.712 | 0.135 | 0.458 | 0.168 | 0.293 |
| TOPBP1   | <i>Topbp1</i>    | 0.303 | 0.238 | 0.201 | 0.137 | 0.424 | 0.097 | 0.592 | 0.133 | 0.406 |
| TRAP220  | <i>Med1</i>      | 0.350 | 0.083 | 0.572 | 0.036 | 0.798 | 0.017 | 0.907 | 0.153 | 0.241 |
| TSP1     | <i>Thbs1</i>     | 0.121 | 0.291 | 0.683 | 0.505 | 0.447 | 0.995 | 0.176 | 1.492 | 0.021 |
| VINCULIN | <i>Vcl</i>       | 0.378 | 0.070 | 0.692 | 0.189 | 0.265 | 0.408 | 0.024 | 0.476 | 0.003 |
| WASP     | <i>Was</i>       | 0.118 | 0.151 | 0.704 | 0.245 | 0.503 | 0.322 | 0.426 | 0.585 | 0.107 |
| WT1      | <i>Wt1</i>       | 0.140 | 0.136 | 0.846 | 0.389 | 0.555 | 0.419 | 0.559 | 1.344 | 0.040 |
| ZAC1     | <i>Plagl1</i>    | 0.209 | 0.437 | 0.499 | 0.368 | 0.551 | 0.597 | 0.377 | 0.771 | 0.194 |
| ZO2      | <i>Tjp2</i>      | 0.264 | 0.261 | 0.199 | 0.102 | 0.593 | 0.227 | 0.264 | 0.433 | 0.016 |
| ZO3      | <i>Tjp3</i>      | 0.613 | 0.435 | 0.112 | 0.557 | 0.032 | 0.795 | 0.004 | 0.734 | 0.002 |

**Table S7. Expression levels of genes involved in cancer signaling pathway correlated with the increase in calorie restriction (CR) and their gene expression at each level of CR relative to 12h ad libitum intake.**

| Symbol | Gene Symbol   | 10CR  |        |       | 20CR   |       |        | 30CR  |        |       | 40CR  |   |  |
|--------|---------------|-------|--------|-------|--------|-------|--------|-------|--------|-------|-------|---|--|
|        |               | r     | logFC  | p     | logFC  | p     | logFC  | p     | logFC  | p     | logFC | p |  |
| APAF1  | <i>Apaf1</i>  | 0.020 | 0.141  | 0.693 | 0.775  | 0.018 | 0.373  | 0.290 | 0.037  | 0.908 |       |   |  |
| APC    | <i>Apc</i>    | 0.413 | 0.334  | 0.112 | 0.247  | 0.219 | 0.332  | 0.115 | 0.452  | 0.016 |       |   |  |
| ASK1   | <i>Map3k5</i> | 0.525 | 0.195  | 0.382 | 0.019  | 0.928 | 0.152  | 0.494 | 0.294  | 0.137 |       |   |  |
| ATM    | <i>Atm</i>    | 0.005 | 0.105  | 0.576 | -0.050 | 0.780 | 0.011  | 0.954 | -0.078 | 0.646 |       |   |  |
| ATR    | <i>Atr</i>    | 0.422 | 0.237  | 0.206 | 0.302  | 0.089 | 0.340  | 0.068 | 0.422  | 0.011 |       |   |  |
| AXIN   | <i>Axin1</i>  | 0.117 | -0.146 | 0.373 | -0.029 | 0.851 | -0.154 | 0.349 | 0.088  | 0.540 |       |   |  |
| B-RAF  | <i>Braf</i>   | 0.417 | -0.058 | 0.768 | -0.284 | 0.132 | 0.114  | 0.560 | 0.303  | 0.080 |       |   |  |

|          |                |        |        |       |        |       |        |       |        |       |
|----------|----------------|--------|--------|-------|--------|-------|--------|-------|--------|-------|
| BAD      | <i>Bad</i>     | 0.476  | -0.024 | 0.925 | 0.089  | 0.711 | 0.240  | 0.339 | 0.415  | 0.062 |
| BAK      | <i>Bak1</i>    | -0.276 | 0.001  | 0.996 | 0.172  | 0.541 | -0.274 | 0.363 | -0.446 | 0.093 |
| BAX      | <i>Bax</i>     | -0.138 | -0.095 | 0.696 | 0.118  | 0.604 | -0.205 | 0.403 | -0.219 | 0.312 |
| BCL2     | <i>Bcl2</i>    | -0.221 | 0.665  | 0.077 | 0.396  | 0.274 | -0.449 | 0.265 | -0.401 | 0.256 |
| BclXL    | <i>Bcl2l1</i>  | -0.005 | 0.134  | 0.473 | 0.224  | 0.205 | -0.077 | 0.684 | 0.065  | 0.695 |
| BIM      | <i>Bcl2l1l</i> | 0.546  | 0.078  | 0.774 | 0.328  | 0.199 | 0.371  | 0.167 | 0.574  | 0.016 |
| BMPR2    | <i>Bmpr2</i>   | 0.334  | 0.618  | 0.038 | 0.610  | 0.032 | 0.562  | 0.060 | 0.606  | 0.024 |
| BRCA1    | <i>Brcal</i>   | 0.463  | 0.008  | 0.985 | 0.734  | 0.055 | 0.903  | 0.024 | 1.072  | 0.003 |
| c-Fos    | <i>Fos</i>     | 0.121  | -1.152 | 0.104 | 0.271  | 0.656 | -0.193 | 0.770 | 0.217  | 0.705 |
| c-Jun    | <i>Jun</i>     | -0.025 | -0.027 | 0.943 | 0.834  | 0.017 | -0.052 | 0.891 | -0.014 | 0.966 |
| c-RAF    | <i>Raf1</i>    | -0.299 | -0.165 | 0.253 | -0.215 | 0.116 | -0.278 | 0.055 | -0.247 | 0.052 |
| C3G      | <i>Rapgef1</i> | 0.321  | 0.178  | 0.169 | 0.258  | 0.036 | 0.109  | 0.400 | 0.215  | 0.062 |
| Caspase9 | <i>Casp9</i>   | -0.257 | -0.279 | 0.109 | -0.157 | 0.336 | -0.164 | 0.344 | -0.471 | 0.002 |
| CBL      | <i>Cbl</i>     | 0.217  | -0.226 | 0.512 | 0.034  | 0.916 | 0.044  | 0.897 | 0.089  | 0.766 |
| CBP      | <i>Crebbp</i>  | 0.395  | 0.196  | 0.375 | 0.185  | 0.379 | 0.138  | 0.533 | 0.399  | 0.042 |
| CCND1    | <i>Ccnd1</i>   | 0.103  | 0.588  | 0.224 | 1.520  | 0.001 | 1.324  | 0.006 | 0.226  | 0.601 |
| CDHE     | <i>Cdh1</i>    | -0.251 | 0.025  | 0.945 | 0.151  | 0.656 | -0.722 | 0.048 | -0.405 | 0.200 |
| CDK2     | <i>Cdk2</i>    | 0.027  | 0.145  | 0.420 | -0.176 | 0.315 | 0.068  | 0.709 | -0.078 | 0.631 |
| CHK2     | <i>Chek2</i>   | -0.238 | 0.188  | 0.623 | 0.426  | 0.234 | 0.330  | 0.386 | -0.226 | 0.524 |
| CRK      | <i>Crk</i>     | 0.303  | 0.242  | 0.138 | 0.011  | 0.943 | 0.190  | 0.245 | 0.274  | 0.060 |
| CTNNβ    | <i>Cttnb1</i>  | -0.363 | -0.100 | 0.550 | -0.083 | 0.601 | -0.220 | 0.190 | -0.268 | 0.069 |
| CTNNδ    | <i>Ctnd1</i>   | -0.070 | -0.185 | 0.187 | -0.089 | 0.502 | -0.154 | 0.274 | -0.124 | 0.314 |
| DAXX     | <i>Daxx</i>    | -0.147 | -0.233 | 0.212 | -0.204 | 0.247 | -0.389 | 0.040 | -0.237 | 0.152 |
| DNAPK    | <i>Prkdc</i>   | -0.237 | -0.157 | 0.479 | -0.085 | 0.682 | -0.346 | 0.126 | -0.229 | 0.246 |
| DSH      | <i>Dvl1</i>    | 0.490  | -0.054 | 0.744 | 0.094  | 0.547 | 0.168  | 0.306 | 0.288  | 0.047 |
| ELK-1    | <i>Elk1</i>    | -0.377 | -0.063 | 0.808 | 0.045  | 0.852 | -0.388 | 0.142 | -0.412 | 0.077 |
| EPAC1    | <i>Rapgef3</i> | -0.192 | 0.200  | 0.525 | 0.094  | 0.754 | -0.223 | 0.498 | -0.083 | 0.774 |
| FADD     | <i>Fadd</i>    | -0.480 | -0.293 | 0.095 | -0.301 | 0.070 | -0.415 | 0.019 | -0.565 | 0.000 |
| FAK      | <i>Ptk2</i>    | -0.093 | 0.133  | 0.357 | 0.032  | 0.819 | -0.038 | 0.797 | 0.021  | 0.873 |
| FAS      | <i>Fas</i>     | 0.107  | 0.015  | 0.932 | 0.319  | 0.043 | 0.096  | 0.570 | 0.187  | 0.212 |
| FLIP     | <i>Cflar</i>   | 0.329  | 0.243  | 0.163 | 0.046  | 0.782 | 0.211  | 0.225 | 0.278  | 0.072 |
| FOXO1    | <i>Foxo1</i>   | 0.603  | 0.236  | 0.302 | 0.322  | 0.139 | 0.382  | 0.094 | 0.681  | 0.001 |
| FYN      | <i>Fyn</i>     | -0.297 | 0.002  | 0.993 | 0.118  | 0.519 | 0.012  | 0.953 | -0.240 | 0.171 |
| GRB2     | <i>Grb2</i>    | -0.346 | -0.098 | 0.434 | 0.003  | 0.982 | -0.104 | 0.405 | -0.123 | 0.266 |
| GSK3β    | <i>Gsk3b</i>   | 0.117  | 0.144  | 0.273 | 0.063  | 0.614 | 0.006  | 0.966 | 0.095  | 0.416 |
| HAT1     | <i>Hat1</i>    | -0.099 | 0.082  | 0.702 | 0.107  | 0.596 | 0.106  | 0.620 | -0.017 | 0.929 |
| HIF1α    | <i>Hif1a</i>   | 0.060  | 0.008  | 0.954 | -0.089 | 0.502 | -0.113 | 0.421 | -0.054 | 0.661 |
| HIPK2    | <i>Hipk2</i>   | 0.317  | 0.359  | 0.141 | -0.016 | 0.945 | 0.068  | 0.782 | 0.299  | 0.172 |
| IRS1     | <i>Irs1</i>    | 0.120  | -0.229 | 0.408 | -0.191 | 0.466 | -0.129 | 0.639 | 0.412  | 0.089 |
| MAX      | <i>Max</i>     | -0.149 | 0.166  | 0.250 | 0.098  | 0.476 | -0.038 | 0.795 | -0.022 | 0.866 |
| MDM2     | <i>Mdm2</i>    | 0.001  | 0.116  | 0.521 | 0.217  | 0.203 | 0.048  | 0.791 | 0.120  | 0.456 |
| MIZ1     | <i>Zbtb17</i>  | -0.167 | -0.035 | 0.846 | -0.020 | 0.907 | -0.122 | 0.500 | -0.181 | 0.262 |
| MYC      | <i>Myc</i>     | -0.042 | 0.872  | 0.151 | 0.459  | 0.431 | 0.226  | 0.713 | -0.618 | 0.261 |
| NBS1     | <i>Nbn</i>     | 0.141  | 0.014  | 0.925 | -0.089 | 0.534 | -0.079 | 0.604 | 0.024  | 0.857 |
| NCSTN    | <i>Nestn</i>   | 0.043  | -0.233 | 0.123 | 0.029  | 0.840 | -0.005 | 0.972 | -0.009 | 0.944 |
| NF1      | <i>Nf1</i>     | 0.031  | 0.026  | 0.875 | -0.134 | 0.388 | -0.085 | 0.603 | 0.005  | 0.972 |
| NICD     | <i>Notch1</i>  | 0.150  | -0.173 | 0.398 | 0.081  | 0.675 | 0.095  | 0.640 | 0.226  | 0.207 |
| NLK      | <i>Nlk</i>     | -0.352 | 0.120  | 0.533 | -0.227 | 0.224 | -0.041 | 0.834 | -0.212 | 0.226 |
| p18INK4C | <i>Cdkn2c</i>  | 0.118  | 0.474  | 0.161 | 0.528  | 0.101 | 0.653  | 0.052 | 0.545  | 0.073 |
| p21CIP1  | <i>Cdkn1a</i>  | 0.055  | 0.775  | 0.288 | 1.702  | 0.016 | -0.253 | 0.736 | 1.225  | 0.066 |
| p27KIP1  | <i>Cdkn1b</i>  | -0.152 | 0.054  | 0.745 | -0.047 | 0.766 | -0.197 | 0.243 | -0.047 | 0.748 |
| p300     | <i>Ep300</i>   | 0.476  | 0.129  | 0.501 | 0.097  | 0.593 | 0.087  | 0.650 | 0.432  | 0.011 |
| p53      | <i>Trp53</i>   | -0.159 | 0.136  | 0.551 | 0.326  | 0.131 | -0.272 | 0.245 | -0.076 | 0.711 |

|        |                |        |        |       |        |       |        |       |        |       |
|--------|----------------|--------|--------|-------|--------|-------|--------|-------|--------|-------|
| PTCH   | <i>Ptch1</i>   | 0.204  | -0.103 | 0.684 | -0.136 | 0.572 | -0.397 | 0.125 | 0.184  | 0.410 |
| PUMA   | <i>Bbc3</i>    | -0.311 | -0.894 | 0.013 | -0.599 | 0.071 | -0.364 | 0.293 | -0.659 | 0.033 |
| RalGAP | <i>Ralbp1</i>  | -0.357 | 0.061  | 0.689 | 0.004  | 0.980 | -0.136 | 0.373 | -0.318 | 0.019 |
| RALGEF | <i>Ralgds</i>  | -0.171 | 0.225  | 0.595 | 0.514  | 0.198 | 0.222  | 0.602 | -0.368 | 0.345 |
| RASGAP | <i>Rasa1</i>   | 0.001  | 0.057  | 0.695 | -0.090 | 0.516 | -0.034 | 0.818 | -0.048 | 0.710 |
| RASGRP | <i>Rasgrp1</i> | -0.187 | -0.031 | 0.932 | 0.175  | 0.608 | 0.029  | 0.936 | -0.592 | 0.077 |
| Rb     | <i>Rb1</i>     | -0.315 | 0.052  | 0.757 | -0.338 | 0.039 | -0.251 | 0.146 | -0.217 | 0.153 |
| RBL1   | <i>Rbl1</i>    | -0.021 | 0.645  | 0.161 | 0.934  | 0.032 | 0.086  | 0.858 | -0.011 | 0.980 |
| RBPJK  | <i>Rbpj</i>    | -0.100 | 0.052  | 0.722 | -0.083 | 0.554 | -0.033 | 0.825 | -0.110 | 0.402 |
| SHC    | <i>Shc1</i>    | -0.180 | -0.091 | 0.512 | 0.026  | 0.845 | -0.072 | 0.607 | -0.258 | 0.036 |
| SHP2   | <i>Ptpn11</i>  | 0.124  | 0.155  | 0.295 | 0.114  | 0.418 | 0.045  | 0.764 | 0.179  | 0.173 |
| SMAC   | <i>Diablo</i>  | -0.164 | -0.006 | 0.968 | 0.107  | 0.482 | -0.172 | 0.298 | -0.090 | 0.533 |
| SMAD4  | <i>Smad4</i>   | 0.360  | 0.133  | 0.407 | -0.007 | 0.962 | 0.110  | 0.493 | 0.229  | 0.106 |
| SMAD6  | <i>Smad6</i>   | 0.041  | -0.118 | 0.627 | 0.074  | 0.744 | -0.081 | 0.740 | -0.183 | 0.399 |
| SMAD7  | <i>Smad7</i>   | 0.052  | 0.229  | 0.338 | 0.123  | 0.588 | 0.431  | 0.069 | -0.247 | 0.254 |
| SMO    | <i>Smo</i>     | -0.431 | -0.320 | 0.397 | -0.254 | 0.477 | -0.951 | 0.015 | -1.234 | 0.000 |
| SRC    | <i>Src</i>     | -0.082 | 0.633  | 0.301 | 1.359  | 0.020 | -0.224 | 0.724 | 0.037  | 0.947 |
| STK6   | <i>Aurka</i>   | -0.053 | -0.194 | 0.695 | 0.913  | 0.040 | -0.333 | 0.507 | 0.189  | 0.661 |
| SUFU   | <i>Sufu</i>    | 0.011  | -0.010 | 0.978 | 0.343  | 0.298 | 0.214  | 0.547 | 0.094  | 0.768 |
| TAB1   | <i>Tab2</i>    | 0.270  | -0.086 | 0.639 | -0.147 | 0.397 | -0.244 | 0.183 | 0.322  | 0.046 |
| tBID   | <i>Bid</i>     | -0.364 | -0.040 | 0.835 | -0.201 | 0.275 | -0.184 | 0.345 | -0.408 | 0.019 |
| TGFβR1 | <i>Tgfbr1</i>  | 0.221  | 0.328  | 0.077 | 0.288  | 0.103 | 0.280  | 0.132 | 0.358  | 0.031 |
| TGFβR2 | <i>Tgfbr2</i>  | 0.066  | 0.076  | 0.665 | 0.151  | 0.363 | 0.055  | 0.755 | 0.032  | 0.835 |
| WNT5A  | <i>Wnt5a</i>   | 0.004  | 0.322  | 0.584 | 0.458  | 0.413 | -0.300 | 0.628 | -0.209 | 0.700 |

**Table S8. Expression levels of genes involved in autophagy pathway correlated with the increase in calorie restriction (CR) and their gene expression at each level of CR relative to 12h ad libitum intake.**

| Symbol  | Gene Symbol     | 10CR   |        |       | 20CR   |       | 30CR   |       | 40CR   |       |
|---------|-----------------|--------|--------|-------|--------|-------|--------|-------|--------|-------|
|         |                 | r      | logFC  | p     | logFC  | p     | logFC  | p     | logFC  | p     |
| ATG10   | <i>Atg10</i>    | -0.125 | 0.083  | 0.725 | -0.177 | 0.441 | 0.043  | 0.856 | -0.163 | 0.448 |
| ATG12   | <i>Atg12</i>    | -0.095 | 0.089  | 0.566 | 0.096  | 0.513 | -0.052 | 0.738 | -0.007 | 0.960 |
| ATG13   | <i>Atg13</i>    | -0.003 | -0.132 | 0.372 | -0.241 | 0.088 | -0.143 | 0.335 | -0.097 | 0.458 |
| ATG16L1 | <i>Atg16l1</i>  | 0.651  | 0.036  | 0.842 | 0.033  | 0.848 | 0.144  | 0.427 | 0.466  | 0.004 |
| ATG3    | <i>Atg3</i>     | 0.411  | 0.006  | 0.972 | -0.094 | 0.553 | 0.188  | 0.256 | 0.160  | 0.278 |
| ATG5    | <i>Atg5</i>     | 0.319  | 0.052  | 0.731 | 0.087  | 0.546 | 0.167  | 0.269 | 0.163  | 0.226 |
| ATG7    | <i>Atg7</i>     | -0.403 | -0.189 | 0.229 | -0.108 | 0.465 | -0.277 | 0.080 | -0.358 | 0.010 |
| BCL2    | <i>Bcl2</i>     | -0.221 | 0.665  | 0.077 | 0.396  | 0.274 | -0.449 | 0.265 | -0.401 | 0.256 |
| BECN1   | <i>Becn1</i>    | -0.366 | 0.115  | 0.361 | -0.052 | 0.665 | -0.123 | 0.333 | -0.024 | 0.831 |
| FIP200  | <i>Rb1cc1</i>   | 0.399  | 0.184  | 0.299 | 0.049  | 0.773 | 0.171  | 0.335 | 0.273  | 0.083 |
| LAMP1   | <i>Lamp1</i>    | -0.301 | -0.006 | 0.973 | 0.007  | 0.963 | -0.116 | 0.472 | -0.100 | 0.478 |
| LAMP2   | <i>Lamp2</i>    | -0.611 | -0.130 | 0.494 | -0.260 | 0.152 | -0.272 | 0.155 | -0.192 | 0.253 |
| LC3-II  | <i>Map1lc3a</i> | 0.450  | -0.003 | 0.986 | 0.106  | 0.572 | 0.183  | 0.353 | 0.497  | 0.004 |
| LC3-II  | <i>Map1lc3b</i> | 0.486  | -0.009 | 0.956 | 0.133  | 0.369 | 0.109  | 0.485 | 0.238  | 0.085 |
| mTOR    | <i>Mtor</i>     | -0.119 | 0.060  | 0.704 | 0.159  | 0.289 | 0.043  | 0.787 | -0.122 | 0.384 |
| NBR1    | <i>Nbr1</i>     | 0.080  | -0.032 | 0.843 | -0.176 | 0.249 | -0.051 | 0.752 | -0.015 | 0.915 |
| SQSTM1  | <i>Sqstm1</i>   | -0.287 | 0.000  | 0.999 | 0.200  | 0.481 | -0.483 | 0.110 | -0.475 | 0.072 |
| STX17   | <i>Stx17</i>    | 0.403  | 0.117  | 0.464 | -0.034 | 0.824 | 0.199  | 0.210 | 0.160  | 0.257 |
| ULK1    | <i>Ulk1</i>     | -0.040 | -0.384 | 0.029 | -0.214 | 0.197 | -0.290 | 0.098 | -0.103 | 0.504 |
| WDFY3   | <i>Wdfy3</i>    | 0.471  | 0.120  | 0.531 | 0.106  | 0.561 | 0.198  | 0.302 | 0.309  | 0.070 |
| WIPI1   | <i>Wipi1</i>    | 0.054  | -0.500 | 0.019 | -0.287 | 0.148 | -0.371 | 0.079 | -0.174 | 0.344 |

**Table S9. Expression levels of genes involved in fuel utilization correlated with the increase in calorie restriction (CR) and their gene expression at each level of CR relative to 12h ad libitum intake.**

| Symbol    | Gene Symbol                | r      | 10CR   |       | 20CR   |       | 30CR   |       | 40CR   |       |
|-----------|----------------------------|--------|--------|-------|--------|-------|--------|-------|--------|-------|
|           |                            |        | logF C | p     | logF C | p     | logF C | p     | logF C | p     |
| ABAD      | <i>Hsd17b1</i><br><i>0</i> | 0.523  | -0.002 | 0.991 | -0.016 | 0.930 | 0.165  | 0.382 | 0.322  | 0.055 |
| ACAA1     | <i>Acaa1a</i>              | 0.364  | 0.098  | 0.609 | 0.178  | 0.323 | 0.286  | 0.129 | 0.158  | 0.346 |
| Acaa1b    | <i>Acaa1b</i>              | 0.340  | 0.334  | 0.329 | 0.184  | 0.574 | 0.655  | 0.055 | 0.551  | 0.072 |
| ACAA2     | <i>Acaa2</i>               | 0.309  | 0.054  | 0.780 | -0.024 | 0.896 | 0.132  | 0.493 | 0.205  | 0.230 |
| ACADM     | <i>Acadm</i>               | 0.561  | 0.138  | 0.510 | 0.243  | 0.222 | 0.384  | 0.065 | 0.601  | 0.001 |
| ACO1      | <i>Aco1</i>                | 0.057  | -0.037 | 0.829 | -0.085 | 0.606 | -0.056 | 0.746 | -0.013 | 0.932 |
| ACO2      | <i>Aco2</i>                | 0.698  | 0.123  | 0.600 | 0.349  | 0.117 | 0.513  | 0.028 | 0.652  | 0.002 |
| ACSL1     | <i>Acs11</i>               | 0.247  | 0.390  | 0.179 | -0.073 | 0.794 | 0.234  | 0.422 | 0.143  | 0.581 |
| ACSL3     | <i>Acs13</i>               | 0.024  | -0.361 | 0.132 | -0.082 | 0.715 | 0.088  | 0.711 | -0.402 | 0.056 |
| ACSL4     | <i>Acs14</i>               | -0.161 | 0.140  | 0.550 | 0.298  | 0.179 | 0.062  | 0.792 | -0.162 | 0.434 |
| ACSL5     | <i>Acs15</i>               | -0.021 | -0.622 | 0.011 | -0.484 | 0.035 | -0.320 | 0.185 | -0.242 | 0.254 |
| ADRB3     | <i>Adrb3</i>               | -0.524 | -0.341 | 0.498 | -1.337 | 0.007 | -0.883 | 0.087 | -1.689 | 0.000 |
| AIF       | <i>Aifm1</i>               | 0.086  | -0.143 | 0.341 | -0.080 | 0.574 | -0.018 | 0.902 | 0.062  | 0.640 |
| ALDOA     | <i>Aldoa</i>               | 0.291  | -0.060 | 0.753 | 0.237  | 0.191 | 0.093  | 0.625 | 0.226  | 0.181 |
| ALDOB     | <i>Aldob</i>               | 0.504  | -0.169 | 0.509 | -0.091 | 0.705 | 0.174  | 0.494 | 0.452  | 0.046 |
| ALDOC     | <i>Aldoc</i>               | 0.152  | -0.490 | 0.215 | 0.132  | 0.721 | 0.167  | 0.665 | -0.176 | 0.608 |
| APP       | <i>App</i>                 | -0.016 | 0.306  | 0.340 | 0.670  | 0.028 | 0.244  | 0.448 | 0.269  | 0.347 |
| ATP5A1    | <i>Atp5a1</i>              | 0.575  | -0.066 | 0.715 | -0.075 | 0.660 | 0.141  | 0.431 | 0.222  | 0.163 |
| ATP5B     | <i>Atp5b</i>               | 0.608  | 0.007  | 0.968 | 0.061  | 0.725 | 0.211  | 0.244 | 0.352  | 0.029 |
| ATP5C1    | <i>Atp5c1</i>              | 0.683  | 0.085  | 0.650 | 0.090  | 0.615 | 0.302  | 0.106 | 0.362  | 0.030 |
| ATP5D     | <i>Atp5d</i>               | 0.348  | -0.031 | 0.846 | 0.056  | 0.708 | 0.065  | 0.679 | 0.176  | 0.205 |
| ATP5F1    | <i>Atp5f1</i>              | 0.662  | 0.036  | 0.831 | 0.033  | 0.838 | 0.280  | 0.099 | 0.316  | 0.037 |
| ATP5G3    | <i>Atp5g3</i>              | 0.520  | 0.163  | 0.313 | 0.005  | 0.972 | 0.301  | 0.061 | 0.313  | 0.029 |
| ATP5H     | <i>Atp5h</i>               | 0.687  | -0.067 | 0.717 | -0.014 | 0.937 | 0.266  | 0.149 | 0.381  | 0.020 |
| ATP5J     | <i>Atp5j</i>               | 0.267  | 0.038  | 0.814 | -0.120 | 0.436 | 0.138  | 0.393 | 0.099  | 0.489 |
| ATP5J2    | <i>Atp5j2</i>              | 0.360  | 0.175  | 0.317 | -0.007 | 0.966 | 0.267  | 0.125 | 0.255  | 0.100 |
| AUH       | <i>Auh</i>                 | 0.032  | 0.079  | 0.611 | -0.119 | 0.422 | 0.004  | 0.978 | 0.001  | 0.995 |
| BCL2      | <i>Bcl2</i>                | -0.221 | 0.665  | 0.077 | 0.396  | 0.274 | -0.449 | 0.265 | -0.401 | 0.256 |
| BECN1     | <i>Becn1</i>               | -0.366 | 0.115  | 0.361 | -0.052 | 0.665 | -0.123 | 0.333 | -0.024 | 0.831 |
| BPGM      | <i>Bpgm</i>                | -0.142 | -0.084 | 0.666 | 0.123  | 0.500 | -0.226 | 0.251 | 0.207  | 0.226 |
| CAMK4     | <i>Camk4</i>               | 0.023  | 0.409  | 0.340 | 0.055  | 0.896 | -0.389 | 0.397 | 0.076  | 0.845 |
| Caspase 3 | <i>Casp3</i>               | -0.315 | -0.439 | 0.038 | -0.312 | 0.115 | -0.059 | 0.774 | -0.472 | 0.011 |
| Caspase 8 | <i>Casp8</i>               | 0.075  | 0.093  | 0.508 | 0.039  | 0.770 | 0.047  | 0.737 | -0.072 | 0.568 |
| Caspase 9 | <i>Casp9</i>               | -0.257 | -0.279 | 0.109 | -0.157 | 0.336 | -0.164 | 0.344 | -0.471 | 0.002 |
| CAT       | <i>Cat</i>                 | -0.805 | -0.091 | 0.700 | -0.470 | 0.039 | -0.487 | 0.043 | -0.668 | 0.001 |
| CHUK      | <i>Chuk</i>                | 0.065  | 0.152  | 0.458 | -0.183 | 0.349 | 0.035  | 0.865 | -0.021 | 0.908 |
| COX4I1    | <i>Cox4i1</i>              | 0.429  | -0.070 | 0.693 | 0.002  | 0.993 | 0.155  | 0.381 | 0.202  | 0.199 |
| COX5A     | <i>Cox5a</i>               | 0.576  | -0.010 | 0.952 | -0.054 | 0.740 | 0.230  | 0.176 | 0.293  | 0.053 |

|          |                 |        |        |       |        |       |        |       |        |       |
|----------|-----------------|--------|--------|-------|--------|-------|--------|-------|--------|-------|
| COX6A1   | <i>Cox6a1</i>   | 0.406  | 0.082  | 0.596 | -0.055 | 0.706 | 0.049  | 0.752 | 0.205  | 0.135 |
| COX6B1   | <i>Cox6b1</i>   | 0.367  | 0.100  | 0.548 | -0.003 | 0.987 | 0.158  | 0.344 | 0.229  | 0.122 |
| COX7A1   | <i>Cox7a1</i>   | 0.820  | 0.405  | 0.386 | 0.721  | 0.099 | 1.188  | 0.008 | 1.585  | 0.000 |
| COX7A2   | <i>Cox7a2</i>   | -0.035 | 0.050  | 0.751 | -0.173 | 0.300 | -0.024 | 0.893 | -0.017 | 0.911 |
| COX7B    | <i>Cox7b</i>    | 0.545  | 0.179  | 0.410 | -0.066 | 0.752 | 0.400  | 0.065 | 0.404  | 0.037 |
| COX8A    | <i>Cox8a</i>    | 0.627  | 0.119  | 0.465 | -0.027 | 0.863 | 0.247  | 0.130 | 0.298  | 0.040 |
| CRTC3    | <i>Crtc3</i>    | -0.027 | -0.254 | 0.137 | -0.181 | 0.258 | -0.286 | 0.096 | -0.041 | 0.780 |
| CS       | <i>Cs</i>       | -0.012 | -0.604 | 0.005 | -0.502 | 0.014 | -0.238 | 0.266 | -0.259 | 0.170 |
| DHOH     | <i>Dhodh</i>    | -0.254 | -0.337 | 0.151 | 0.007  | 0.972 | -0.111 | 0.627 | -0.262 | 0.204 |
| DHTKD1   | <i>Dhtkd1</i>   | 0.515  | 0.213  | 0.316 | 0.040  | 0.842 | 0.355  | 0.094 | 0.333  | 0.078 |
| DJ - 1   | <i>Park7</i>    | 0.310  | 0.002  | 0.986 | -0.045 | 0.741 | 0.115  | 0.416 | 0.181  | 0.149 |
| DLD      | <i>Dld</i>      | 0.453  | 0.035  | 0.817 | -0.081 | 0.570 | 0.093  | 0.534 | 0.243  | 0.067 |
| DLST     | <i>Dlst</i>     | 0.479  | 0.107  | 0.519 | 0.124  | 0.433 | 0.242  | 0.144 | 0.311  | 0.035 |
| ECHS1    | <i>Echs1</i>    | 0.632  | -0.040 | 0.833 | -0.011 | 0.950 | 0.319  | 0.092 | 0.289  | 0.086 |
| ECI1     | <i>Eci1</i>     | 0.315  | 0.098  | 0.596 | 0.029  | 0.870 | 0.364  | 0.048 | 0.136  | 0.408 |
| ECI2     | <i>Eci2</i>     | 0.519  | 0.378  | 0.164 | 0.191  | 0.461 | 0.501  | 0.065 | 0.425  | 0.080 |
| EHHADH   | <i>Ehhadh</i>   | 0.721  | 0.463  | 0.318 | 1.047  | 0.019 | 1.570  | 0.001 | 1.803  | 0.000 |
| ENO1     | <i>Eno1</i>     | 0.524  | -0.496 | 0.113 | -0.147 | 0.615 | 0.086  | 0.778 | 0.433  | 0.108 |
| ENO3     | <i>Eno3</i>     | 0.077  | 0.256  | 0.361 | -0.183 | 0.507 | -0.074 | 0.798 | -0.012 | 0.962 |
| FBP1     | <i>Fbp1</i>     | 0.117  | -0.036 | 0.851 | -0.076 | 0.681 | 0.079  | 0.682 | 0.065  | 0.702 |
| FH       | <i>Fh1</i>      | 0.161  | -0.215 | 0.233 | -0.012 | 0.946 | -0.067 | 0.709 | 0.071  | 0.653 |
| FIS1     | <i>Fis1</i>     | 0.128  | -0.052 | 0.752 | 0.094  | 0.545 | 0.045  | 0.784 | 0.071  | 0.624 |
| FURIN    | <i>Furin</i>    | 0.598  | -0.163 | 0.353 | -0.128 | 0.441 | -0.020 | 0.908 | 0.205  | 0.186 |
| GAPDH    | <i>Gapdh</i>    | 0.360  | -0.139 | 0.484 | -0.112 | 0.552 | -0.076 | 0.701 | 0.262  | 0.134 |
| GNAS     | <i>Gnas</i>     | -0.311 | 0.014  | 0.928 | -0.036 | 0.811 | -0.116 | 0.459 | -0.069 | 0.620 |
| GPD2     | <i>Gpd2</i>     | 0.235  | -0.267 | 0.329 | -0.510 | 0.050 | -0.056 | 0.837 | 0.147  | 0.541 |
| GPI      | <i>Gpi1</i>     | 0.571  | -0.176 | 0.505 | 0.023  | 0.926 | 0.187  | 0.474 | 0.625  | 0.007 |
| GPX4     | <i>Gpx4</i>     | 0.057  | 0.208  | 0.384 | 0.575  | 0.011 | 0.274  | 0.251 | 0.284  | 0.182 |
| GPX7     | <i>Gpx7</i>     | 0.074  | 0.809  | 0.208 | 1.710  | 0.005 | 0.803  | 0.215 | 0.573  | 0.329 |
| GRX2     | <i>Grx2</i>     | 0.014  | 0.050  | 0.737 | -0.113 | 0.423 | 0.041  | 0.784 | 0.070  | 0.592 |
| GSR      | <i>Gsr</i>      | -0.153 | 0.054  | 0.710 | 0.121  | 0.376 | -0.187 | 0.198 | -0.034 | 0.788 |
| HADH     | <i>Hadh</i>     | 0.620  | 0.147  | 0.475 | 0.343  | 0.080 | 0.565  | 0.006 | 0.511  | 0.005 |
| HADHA    | <i>Hadha</i>    | 0.377  | 0.038  | 0.833 | 0.067  | 0.693 | 0.044  | 0.805 | 0.178  | 0.262 |
| HSD17B10 | <i>Hsd17b10</i> | 0.523  | -0.002 | 0.991 | -0.016 | 0.930 | 0.165  | 0.382 | 0.322  | 0.055 |
| HSD17B4  | <i>Hsd17b4</i>  | 0.149  | -0.001 | 0.997 | -0.060 | 0.723 | 0.055  | 0.758 | 0.166  | 0.295 |
| HSD17B8  | <i>H2-Ke6</i>   | -0.084 | -0.332 | 0.043 | -0.167 | 0.281 | -0.228 | 0.163 | -0.099 | 0.489 |
| HtrA2    | <i>Htra2</i>    | 0.193  | -0.097 | 0.668 | 0.174  | 0.408 | 0.151  | 0.497 | -0.007 | 0.970 |
| HTT      | <i>Htt</i>      | -0.338 | -0.107 | 0.582 | -0.185 | 0.315 | -0.267 | 0.174 | -0.313 | 0.070 |
| IDH3A    | <i>Idh3a</i>    | 0.806  | 0.181  | 0.412 | 0.233  | 0.266 | 0.541  | 0.013 | 0.850  | 0.000 |
| IDH3B    | <i>Idh3b</i>    | 0.631  | 0.148  | 0.324 | 0.073  | 0.611 | 0.256  | 0.088 | 0.300  | 0.024 |
| IDH3G    | <i>Idh3g</i>    | 0.371  | 0.054  | 0.668 | -0.030 | 0.805 | 0.104  | 0.413 | 0.178  | 0.113 |
| IL15     | <i>Il15</i>     | 0.392  | 0.490  | 0.203 | 0.285  | 0.446 | 0.576  | 0.133 | 0.482  | 0.165 |
| IVD      | <i>Ivd</i>      | 0.083  | 0.075  | 0.626 | 0.006  | 0.969 | 0.091  | 0.551 | 0.057  | 0.675 |
| KGDH     | <i>Ogdh</i>     | 0.350  | -0.016 | 0.923 | 0.030  | 0.849 | 0.021  | 0.900 | 0.117  | 0.428 |
| LETM1    | <i>Letm1</i>    | -0.130 | -0.091 | 0.533 | -0.139 | 0.315 | -0.284 | 0.054 | 0.067  | 0.603 |

|          |                |        |        |       |        |       |        |       |        |       |
|----------|----------------|--------|--------|-------|--------|-------|--------|-------|--------|-------|
| LRRK2    | <i>Lrrk2</i>   | 0.014  | 0.417  | 0.191 | 0.147  | 0.636 | 0.226  | 0.488 | -0.107 | 0.721 |
| MAOA     | <i>Maoa</i>    | 0.678  | 0.006  | 0.974 | 0.224  | 0.203 | 0.559  | 0.002 | 0.559  | 0.001 |
| MAOB     | <i>Maob</i>    | 0.756  | 0.141  | 0.522 | 0.283  | 0.177 | 0.603  | 0.006 | 0.680  | 0.001 |
| MDH1     | <i>Mdh1</i>    | 0.205  | -0.074 | 0.681 | -0.112 | 0.514 | 0.035  | 0.848 | 0.028  | 0.862 |
| MDH2     | <i>Mdh2</i>    | 0.482  | -0.093 | 0.652 | 0.258  | 0.185 | 0.204  | 0.320 | 0.518  | 0.005 |
| ME1      | <i>Me1</i>     | 0.029  | -0.743 | 0.073 | -0.928 | 0.018 | -0.228 | 0.577 | -0.288 | 0.423 |
| ME2      | <i>Me2</i>     | -0.006 | 0.269  | 0.424 | 0.461  | 0.146 | 0.228  | 0.502 | -0.076 | 0.803 |
| MIRO2    | <i>Rhot2</i>   | 0.348  | 0.116  | 0.416 | 0.148  | 0.274 | 0.171  | 0.231 | 0.300  | 0.018 |
| MKK4     | <i>Map2k4</i>  | 0.197  | 0.077  | 0.479 | 0.047  | 0.645 | 0.102  | 0.344 | 0.109  | 0.258 |
| mtSOD    | <i>Sod2</i>    | 0.568  | 0.162  | 0.327 | 0.034  | 0.827 | 0.255  | 0.122 | 0.320  | 0.029 |
| NCT      | <i>Nestn</i>   | 0.043  | -0.233 | 0.123 | 0.029  | 0.840 | -0.005 | 0.972 | -0.009 | 0.944 |
| NDUFA1   | <i>Ndufa11</i> | 0.343  | -0.008 | 0.966 | -0.061 | 0.720 | 0.043  | 0.813 | 0.309  | 0.052 |
| NDUFA10  | <i>Ndufa10</i> | 0.380  | -0.059 | 0.689 | -0.060 | 0.667 | 0.067  | 0.650 | 0.178  | 0.171 |
| NDUFA12  | <i>Ndufa12</i> | 0.621  | 0.163  | 0.382 | -0.044 | 0.803 | 0.238  | 0.199 | 0.529  | 0.001 |
| NDUFA13  | <i>Ndufa13</i> | -0.200 | -0.008 | 0.956 | -0.104 | 0.471 | -0.102 | 0.503 | -0.041 | 0.761 |
| NDUFA2   | <i>Ndufa2</i>  | 0.152  | 0.046  | 0.808 | -0.218 | 0.231 | 0.171  | 0.363 | 0.176  | 0.293 |
| NDUFA3   | <i>Ndufa3</i>  | 0.193  | 0.062  | 0.725 | -0.118 | 0.487 | 0.091  | 0.609 | 0.205  | 0.192 |
| NDUFA4   | <i>Ndufa4</i>  | 0.235  | 0.008  | 0.967 | -0.215 | 0.256 | 0.023  | 0.906 | 0.173  | 0.326 |
| NDUFA5   | <i>Ndufa5</i>  | 0.543  | 0.156  | 0.443 | -0.052 | 0.790 | 0.459  | 0.022 | 0.396  | 0.027 |
| NDUFA6   | <i>Ndufa6</i>  | 0.263  | 0.007  | 0.975 | -0.353 | 0.084 | 0.022  | 0.917 | 0.174  | 0.357 |
| NDUFA7   | <i>Ndufa7</i>  | 0.634  | 0.083  | 0.645 | 0.182  | 0.286 | 0.388  | 0.029 | 0.509  | 0.001 |
| NDUFA8   | <i>Ndufa8</i>  | 0.619  | -0.072 | 0.665 | 0.003  | 0.986 | 0.108  | 0.514 | 0.355  | 0.016 |
| NDUFA9   | <i>Ndufa9</i>  | 0.506  | -0.136 | 0.385 | -0.142 | 0.340 | 0.097  | 0.535 | 0.240  | 0.082 |
| NDUF AF1 | <i>Ndufaf1</i> | -0.610 | -0.265 | 0.184 | -0.352 | 0.064 | -0.390 | 0.053 | -0.460 | 0.009 |
| NDUFB10  | <i>Ndufb10</i> | 0.543  | -0.001 | 0.995 | 0.011  | 0.939 | 0.205  | 0.185 | 0.300  | 0.029 |
| NDUFB11  | <i>Ndufb11</i> | 0.296  | -0.105 | 0.560 | -0.182 | 0.289 | 0.071  | 0.694 | 0.170  | 0.287 |
| NDUFB2   | <i>Ndufb2</i>  | 0.001  | 0.182  | 0.328 | 0.054  | 0.759 | 0.065  | 0.728 | 0.111  | 0.503 |
| NDUFB3   | <i>Ndufb3</i>  | 0.139  | 0.030  | 0.867 | -0.329 | 0.059 | 0.021  | 0.906 | -0.005 | 0.975 |
| NDUFB4   | <i>Ndufb4</i>  | 0.336  | 0.126  | 0.486 | 0.133  | 0.437 | 0.234  | 0.194 | 0.306  | 0.056 |
| NDUFB5   | <i>Ndufb5</i>  | 0.524  | 0.028  | 0.859 | -0.107 | 0.474 | 0.202  | 0.194 | 0.242  | 0.080 |
| NDUFB6   | <i>Ndufb6</i>  | 0.463  | -0.075 | 0.683 | -0.129 | 0.460 | 0.235  | 0.195 | 0.313  | 0.053 |
| NDUFB7   | <i>Ndufb7</i>  | 0.210  | -0.112 | 0.460 | -0.112 | 0.436 | 0.094  | 0.533 | 0.100  | 0.454 |
| NDUFB8   | <i>Ndufb8</i>  | 0.569  | 0.000  | 0.998 | -0.160 | 0.404 | 0.328  | 0.102 | 0.320  | 0.074 |
| NDUFB9   | <i>Ndufb9</i>  | 0.534  | 0.048  | 0.799 | 0.000  | 0.999 | 0.231  | 0.216 | 0.264  | 0.112 |
| NDUFS1   | <i>Ndufs1</i>  | 0.478  | -0.006 | 0.967 | -0.111 | 0.427 | 0.180  | 0.219 | 0.164  | 0.208 |
| NDUFS2   | <i>Ndufs2</i>  | 0.625  | 0.013  | 0.932 | 0.036  | 0.798 | 0.119  | 0.423 | 0.305  | 0.021 |
| NDUFS4   | <i>Ndufs4</i>  | 0.355  | -0.007 | 0.966 | -0.166 | 0.300 | 0.263  | 0.113 | 0.105  | 0.477 |
| NDUFS6   | <i>Ndufs6</i>  | -0.050 | 0.121  | 0.547 | -0.091 | 0.555 | 0.001  | 0.994 | 0.065  | 0.648 |
| NDUFS7   | <i>Ndufs7</i>  | 0.219  | -0.141 | 0.391 | -0.140 | 0.371 | -0.018 | 0.914 | 0.065  | 0.652 |
| NDUFS8   | <i>Ndufs8</i>  | 0.027  | -0.019 | 0.899 | 0.063  | 0.651 | 0.065  | 0.654 | -0.011 | 0.935 |
| NDUFV1   | <i>Ndufv1</i>  | 0.572  | -0.139 | 0.404 | -0.064 | 0.686 | 0.002  | 0.988 | 0.280  | 0.057 |
| NDUFV2   | <i>Ndufv2</i>  | 0.592  | 0.097  | 0.572 | 0.012  | 0.942 | 0.273  | 0.112 | 0.405  | 0.008 |
| NDUFV3   | <i>Ndufv3</i>  | 0.374  | 0.102  | 0.491 | 0.025  | 0.858 | 0.089  | 0.548 | 0.223  | 0.088 |
| NOS3     | <i>Nos3</i>    | -0.093 | -0.404 | 0.219 | 0.012  | 0.968 | -0.140 | 0.663 | -0.345 | 0.232 |
| NR1D1    | <i>Nr1d1</i>   | -0.724 | -0.966 | 0.028 | -1.327 | 0.002 | -1.619 | 0.000 | -1.734 | 0.000 |



|                    |                 |        |        |       |        |       |        |       |        |       |
|--------------------|-----------------|--------|--------|-------|--------|-------|--------|-------|--------|-------|
| OGDH               | <i>Ogdh</i>     | 0.350  | -0.016 | 0.923 | 0.030  | 0.849 | 0.021  | 0.900 | 0.117  | 0.428 |
| Parkin             | <i>Park2</i>    | 0.012  | 0.161  | 0.636 | -0.111 | 0.734 | 0.515  | 0.121 | -0.210 | 0.496 |
| PDHA               | <i>Pdha1</i>    | 0.650  | 0.140  | 0.497 | -0.122 | 0.533 | 0.296  | 0.148 | 0.367  | 0.045 |
| PFKL               | <i>Pfkl</i>     | -0.327 | -0.080 | 0.672 | 0.056  | 0.753 | -0.087 | 0.648 | -0.128 | 0.448 |
| PFKM               | <i>Pfkm</i>     | 0.407  | -0.325 | 0.099 | -0.114 | 0.536 | 0.205  | 0.282 | -0.001 | 0.993 |
| PFKP               | <i>Pfkp</i>     | 0.187  | 0.393  | 0.179 | 0.529  | 0.057 | 0.238  | 0.419 | 0.323  | 0.217 |
| PGAM1              | <i>Pgam1</i>    | 0.383  | 0.018  | 0.911 | 0.009  | 0.953 | 0.039  | 0.803 | 0.328  | 0.018 |
| PGK1               | <i>Pgk1</i>     | 0.756  | -0.019 | 0.925 | 0.161  | 0.407 | 0.353  | 0.083 | 0.616  | 0.001 |
| PINK1              | <i>Pink1</i>    | 0.640  | -0.059 | 0.736 | 0.072  | 0.663 | 0.211  | 0.224 | 0.305  | 0.049 |
| PKLR               | <i>Pklr</i>     | -0.281 | -0.556 | 0.146 | -0.928 | 0.011 | -0.253 | 0.505 | -0.495 | 0.137 |
| PKM                | <i>Pkm</i>      | -0.155 | -0.011 | 0.971 | 0.418  | 0.148 | -0.176 | 0.569 | -0.358 | 0.188 |
| PPARGC1A           | <i>Ppargc1a</i> | 0.806  | -0.172 | 0.624 | 0.249  | 0.452 | 0.623  | 0.071 | 1.064  | 0.001 |
| PPARGC1B           | <i>Ppargc1b</i> | 0.189  | 0.051  | 0.824 | -0.193 | 0.380 | -0.001 | 0.998 | -0.106 | 0.605 |
| PRX3               | <i>Prdx3</i>    | 0.266  | -0.107 | 0.511 | 0.132  | 0.391 | 0.166  | 0.306 | 0.171  | 0.234 |
| PRX5               | <i>Prdx5</i>    | -0.083 | 0.021  | 0.892 | -0.019 | 0.897 | -0.041 | 0.789 | -0.007 | 0.962 |
| PSEN1              | <i>Psen1</i>    | -0.026 | -0.026 | 0.820 | 0.078  | 0.477 | -0.049 | 0.677 | 0.013  | 0.896 |
| PTEN               | <i>Pten</i>     | 0.131  | 0.001  | 0.995 | -0.097 | 0.595 | 0.069  | 0.717 | 0.041  | 0.807 |
| SCP2               | <i>Scp2</i>     | -0.808 | -0.096 | 0.729 | -0.584 | 0.028 | -0.608 | 0.031 | -0.742 | 0.002 |
| SDHA               | <i>Sdha</i>     | 0.185  | -0.084 | 0.658 | -0.239 | 0.185 | 0.027  | 0.886 | 0.013  | 0.937 |
| SDHB               | <i>Sdhb</i>     | 0.462  | 0.127  | 0.474 | -0.026 | 0.876 | 0.195  | 0.271 | 0.193  | 0.220 |
| SDHC               | <i>Sdhc</i>     | 0.632  | -0.009 | 0.957 | 0.101  | 0.502 | 0.244  | 0.121 | 0.251  | 0.073 |
| SDHD               | <i>Sdhd</i>     | 0.735  | -0.042 | 0.850 | -0.024 | 0.909 | 0.411  | 0.063 | 0.435  | 0.028 |
| SDS                | <i>Sds</i>      | 0.552  | -0.177 | 0.474 | 0.353  | 0.130 | 0.513  | 0.035 | 0.445  | 0.042 |
| SIRT1              | <i>Sirt1</i>    | 0.214  | 0.016  | 0.938 | 0.066  | 0.732 | -0.119 | 0.560 | 0.299  | 0.092 |
| SLC27A1            | <i>Slc27a1</i>  | 0.243  | 0.426  | 0.232 | 0.558  | 0.098 | 0.507  | 0.153 | 0.413  | 0.195 |
| SLC27A2            | <i>Slc27a2</i>  | -0.093 | 0.095  | 0.659 | -0.196 | 0.340 | -0.106 | 0.622 | -0.149 | 0.434 |
| SLC27A4            | <i>Slc27a4</i>  | -0.326 | -0.168 | 0.379 | -0.070 | 0.699 | -0.309 | 0.109 | -0.298 | 0.078 |
| SLC27A5            | <i>Slc27a5</i>  | 0.118  | -0.290 | 0.277 | -0.112 | 0.657 | -0.093 | 0.727 | 0.005  | 0.982 |
| SUCLA2             | <i>Sucla2</i>   | 0.370  | 0.007  | 0.963 | -0.121 | 0.409 | 0.114  | 0.461 | 0.183  | 0.181 |
| SUCLG1             | <i>Suclg1</i>   | 0.279  | -0.007 | 0.963 | 0.015  | 0.923 | 0.156  | 0.331 | 0.137  | 0.338 |
| Synuclein $\alpha$ | <i>Snca</i>     | -0.087 | 0.131  | 0.862 | 1.040  | 0.130 | 0.415  | 0.575 | 0.818  | 0.210 |
| TFAM               | <i>Tfam</i>     | 0.426  | -0.001 | 0.992 | -0.054 | 0.709 | 0.217  | 0.150 | 0.217  | 0.105 |
| TPI1               | <i>Tpi1</i>     | 0.483  | -0.182 | 0.331 | 0.011  | 0.951 | 0.104  | 0.577 | 0.331  | 0.045 |
| TRAK1              | <i>Trak1</i>    | 0.678  | 0.125  | 0.502 | 0.095  | 0.591 | 0.419  | 0.023 | 0.301  | 0.068 |
| TRX2               | <i>Txn2</i>     | 0.583  | 0.027  | 0.862 | 0.236  | 0.109 | 0.181  | 0.242 | 0.340  | 0.014 |
| TRXR2              | <i>Txnrd2</i>   | 0.093  | -0.187 | 0.271 | -0.124 | 0.437 | -0.015 | 0.931 | 0.033  | 0.825 |
| UCP2               | <i>Ucp2</i>     | -0.133 | 0.204  | 0.479 | 0.582  | 0.033 | 0.177  | 0.540 | -0.190 | 0.458 |
| UQCR10             | <i>Uqcr10</i>   | 0.369  | 0.246  | 0.170 | 0.020  | 0.907 | 0.319  | 0.074 | 0.419  | 0.008 |
| UQCRB              | <i>Uqcrb</i>    | 0.516  | 0.178  | 0.401 | -0.102 | 0.618 | 0.259  | 0.226 | 0.308  | 0.106 |
| UQCRC1             | <i>Uqcrc1</i>   | 0.507  | -0.064 | 0.712 | -0.068 | 0.684 | 0.090  | 0.606 | 0.228  | 0.140 |
| UQCRC2             | <i>Uqcrc2</i>   | 0.688  | 0.012  | 0.944 | -0.043 | 0.795 | 0.194  | 0.263 | 0.331  | 0.032 |
| UQCRCFS1           | <i>Uqcrfs1</i>  | 0.618  | 0.012  | 0.942 | -0.067 | 0.660 | 0.212  | 0.181 | 0.320  | 0.023 |
| Xanthine oxidase   | <i>Xdh</i>      | 0.107  | 0.077  | 0.634 | 0.158  | 0.303 | -0.013 | 0.937 | 0.036  | 0.799 |

**Table S10. Expression levels of genes involved in H2S production and signaling pathway correlated with the increase in calorie restriction (CR) and their gene expression at each level of CR relative to 12h ad libitum intake.**

| Symbol   | Gene Symbol  | r      | 10CR   |       | 20CR   |       | 30CR   |       | 40CR   |       |
|----------|--------------|--------|--------|-------|--------|-------|--------|-------|--------|-------|
|          |              |        | logFC  | p     | logFC  | p     | logFC  | p     | logFC  | p     |
| CBS/CBSL | <i>Cbs</i>   | -0.549 | -0.626 | 0.021 | -0.500 | 0.050 | -0.701 | 0.010 | -0.565 | 0.016 |
| CRY1     | <i>Cry1</i>  | 0.785  | 0.676  | 0.138 | 1.026  | 0.018 | 1.333  | 0.003 | 1.800  | 0.000 |
| CRY2     | <i>Cry2</i>  | 0.441  | 0.071  | 0.687 | 0.056  | 0.741 | 0.189  | 0.284 | 0.159  | 0.308 |
| CTH      | <i>Cth</i>   | 0.550  | 0.268  | 0.302 | 0.461  | 0.063 | 0.550  | 0.034 | 1.054  | 0.000 |
| PER1     | <i>Per1</i>  | 0.849  | 0.284  | 0.455 | 0.544  | 0.132 | 0.868  | 0.021 | 1.301  | 0.000 |
| PER2     | <i>Per2</i>  | 0.724  | 0.671  | 0.039 | 0.828  | 0.008 | 1.028  | 0.002 | 0.950  | 0.001 |
| SIRT1    | <i>Sirt1</i> | 0.214  | 0.016  | 0.938 | 0.066  | 0.732 | -0.119 | 0.560 | 0.299  | 0.092 |
| FGF21    | <i>Fgf21</i> | -0.076 | 0.369  | 0.614 | 0.588  | 0.399 | -0.948 | 0.215 | -0.960 | 0.146 |

**Table S11. Expression levels of genes involved in xenobiotic metabolism correlated with the increase in calorie restriction (CR) and their gene expression at each level of CR relative to 12h ad libitum intake.**

| Symbol  | Gene Symbol    | r      | 10CR   |       | 20CR   |       | 30CR   |       | 40CR   |       |
|---------|----------------|--------|--------|-------|--------|-------|--------|-------|--------|-------|
|         |                |        | logFC  | p     | logFC  | p     | logFC  | p     | logFC  | p     |
| ABCA1   | <i>Abca1</i>   | -0.518 | -0.087 | 0.602 | -0.172 | 0.280 | -0.230 | 0.169 | -0.264 | 0.073 |
| ABCG1   | <i>Abcg1</i>   | -0.038 | 0.130  | 0.615 | 0.320  | 0.190 | 0.041  | 0.873 | -0.302 | 0.192 |
| ABCG5   | <i>Abcg5</i>   | 0.286  | 0.287  | 0.179 | 0.106  | 0.604 | 0.276  | 0.196 | 0.139  | 0.464 |
| ABCG8   | <i>Abcg8</i>   | -0.078 | -0.054 | 0.805 | -0.279 | 0.179 | -0.140 | 0.522 | -0.319 | 0.097 |
| AE2     | <i>Slc4a2</i>  | 0.109  | 0.029  | 0.861 | 0.205  | 0.185 | -0.107 | 0.518 | 0.010  | 0.945 |
| AHR     | <i>Ahr</i>     | 0.468  | -0.012 | 0.957 | 0.117  | 0.564 | 0.293  | 0.166 | 0.422  | 0.025 |
| ALAS1   | <i>Alas1</i>   | 0.595  | 0.988  | 0.033 | 1.105  | 0.013 | 1.421  | 0.002 | 0.913  | 0.030 |
| ALDH1A1 | <i>Aldh1a1</i> | -0.379 | 0.234  | 0.324 | -0.117 | 0.606 | -0.105 | 0.660 | -0.037 | 0.860 |
| ALDH1A7 | <i>Aldh1a7</i> | -0.034 | 0.029  | 0.894 | 0.172  | 0.401 | 0.144  | 0.504 | -0.002 | 0.991 |
| ALDH3A2 | <i>Aldh3a2</i> | 0.595  | 0.450  | 0.133 | 0.489  | 0.088 | 0.771  | 0.010 | 0.882  | 0.001 |
| ANKRA2  | <i>Ankra2</i>  | -0.150 | 0.140  | 0.518 | -0.085 | 0.685 | 0.060  | 0.782 | -0.153 | 0.436 |
| ApoA1   | <i>Apoa1</i>   | -0.468 | -0.682 | 0.033 | -0.354 | 0.239 | -0.588 | 0.066 | -0.797 | 0.004 |
| ApoB    | <i>Apob</i>    | -0.239 | 0.044  | 0.827 | -0.174 | 0.358 | -0.202 | 0.313 | -0.057 | 0.747 |
| APOC2   | <i>Apoc2</i>   | 0.073  | 0.211  | 0.366 | 0.551  | 0.013 | 0.171  | 0.464 | 0.218  | 0.293 |
| APOE    | <i>Apoe</i>    | -0.364 | -0.248 | 0.238 | -0.216 | 0.277 | -0.331 | 0.116 | -0.233 | 0.207 |
| ARNT    | <i>Arnt</i>    | 0.457  | 0.085  | 0.566 | 0.091  | 0.519 | 0.273  | 0.063 | 0.201  | 0.126 |
| ASBT    | <i>Slc10a2</i> | -0.623 | -0.542 | 0.345 | -0.396 | 0.463 | -1.162 | 0.049 | -1.764 | 0.001 |
| BAAT    | <i>Baat</i>    | -0.151 | 0.050  | 0.809 | -0.180 | 0.358 | -0.015 | 0.943 | 0.163  | 0.372 |
| BACS    | <i>Slc27a5</i> | 0.118  | -0.290 | 0.277 | -0.112 | 0.657 | -0.093 | 0.727 | 0.005  | 0.982 |
| BSEP    | <i>Abcb11</i>  | -0.627 | -0.395 | 0.138 | -0.610 | 0.016 | -0.552 | 0.039 | -0.446 | 0.055 |
| CAR     | <i>Nr1i3</i>   | 0.691  | 0.674  | 0.140 | 0.656  | 0.133 | 1.327  | 0.004 | 1.153  | 0.005 |
| CAT     | <i>Cat</i>     | -0.805 | -0.091 | 0.700 | -0.470 | 0.039 | -0.487 | 0.043 | -0.668 | 0.001 |
| CCRP    | <i>Dnajc7</i>  | 0.217  | -0.023 | 0.850 | -0.153 | 0.183 | -0.004 | 0.971 | 0.020  | 0.853 |
| CD14    | <i>Cd14</i>    | -0.154 | 0.506  | 0.365 | 0.982  | 0.064 | -0.159 | 0.782 | -0.274 | 0.589 |
| CES3    | <i>Ces3a</i>   | -0.924 | -0.247 | 0.769 | -1.607 | 0.051 | -2.929 | 0.002 | -4.669 | 0.000 |
| ChREBP  | <i>Mlxipl</i>  | -0.493 | -0.236 | 0.412 | -0.743 | 0.007 | -0.638 | 0.028 | -0.520 | 0.040 |
| c-Jun   | <i>Jun</i>     | -0.025 | -0.027 | 0.943 | 0.834  | 0.017 | -0.052 | 0.891 | -0.014 | 0.966 |
| CPT1A   | <i>Cpt1a</i>   | 0.390  | 0.173  | 0.452 | 0.285  | 0.193 | 0.300  | 0.191 | 0.191  | 0.352 |
| c-RAF   | <i>Raf1</i>    | -0.299 | -0.165 | 0.253 | -0.215 | 0.116 | -0.278 | 0.055 | -0.247 | 0.052 |
| CRM-1   | <i>Xpol</i>    | -0.081 | -0.079 | 0.647 | -0.266 | 0.104 | -0.171 | 0.323 | -0.136 | 0.372 |

|          |                |        |        |       |        |       |        |       |        |       |
|----------|----------------|--------|--------|-------|--------|-------|--------|-------|--------|-------|
| CUL3     | <i>Cul3</i>    | 0.353  | 0.026  | 0.864 | -0.092 | 0.531 | -0.025 | 0.870 | 0.187  | 0.169 |
| CYP1A2   | <i>Cyp1a2</i>  | -0.687 | -0.123 | 0.821 | -0.924 | 0.078 | -1.176 | 0.036 | -2.285 | 0.000 |
| CYP1B1   | <i>Cyp1b1</i>  | -0.231 | 0.206  | 0.729 | -0.544 | 0.347 | -0.757 | 0.223 | -1.001 | 0.067 |
| CYP27A1  | <i>Cyp27a1</i> | -0.004 | -0.562 | 0.060 | -0.470 | 0.095 | -0.280 | 0.345 | -0.157 | 0.546 |
| CYP2A6   | <i>Cyp2a5</i>  | 0.169  | 1.206  | 0.015 | 1.435  | 0.003 | 1.390  | 0.005 | 1.171  | 0.009 |
| CYP2B6   | <i>Cyp2b10</i> | -0.133 | 1.602  | 0.277 | 4.118  | 0.008 | 1.852  | 0.213 | 3.296  | 0.024 |
| CYP2C8   | <i>Cyp2c39</i> | 0.876  | 0.691  | 0.457 | 2.302  | 0.011 | 3.947  | 0.000 | 4.260  | 0.000 |
| CYP3A5   | <i>Cyp3a11</i> | 0.415  | 0.541  | 0.169 | 1.047  | 0.005 | 0.772  | 0.049 | 1.286  | 0.000 |
| CYP3A7   | <i>Cyp3a13</i> | 0.611  | 0.099  | 0.736 | 0.829  | 0.003 | 0.649  | 0.025 | 1.007  | 0.000 |
| CYP4A14  | <i>Cyp4a14</i> | 0.822  | 2.801  | 0.015 | 4.426  | 0.000 | 5.538  | 0.000 | 6.391  | 0.000 |
| CYP4A22  | <i>Cyp4a10</i> | 0.830  | 1.612  | 0.047 | 2.220  | 0.005 | 3.406  | 0.000 | 4.024  | 0.000 |
| CYP7A1   | <i>Cyp7a1</i>  | 0.394  | 0.316  | 0.485 | 0.865  | 0.045 | 1.275  | 0.005 | 1.275  | 0.002 |
| CYP8B1   | <i>Cyp8b1</i>  | -0.679 | -0.942 | 0.103 | -1.523 | 0.006 | -1.690 | 0.005 | -2.072 | 0.000 |
| ERK5     | <i>Mapk7</i>   | -0.087 | 0.035  | 0.909 | 0.106  | 0.709 | -0.127 | 0.682 | -0.082 | 0.765 |
| FASN     | <i>Fasn</i>    | -0.367 | -1.511 | 0.008 | -1.297 | 0.014 | -0.592 | 0.280 | -1.562 | 0.001 |
| FBP1     | <i>Fbp1</i>    | 0.117  | -0.036 | 0.851 | -0.076 | 0.681 | 0.079  | 0.682 | 0.065  | 0.702 |
| Fetuin B | <i>Fetub</i>   | -0.149 | -0.354 | 0.192 | 0.252  | 0.325 | -0.229 | 0.398 | -0.330 | 0.165 |
| FGFR4    | <i>Fgfr4</i>   | -0.490 | -0.152 | 0.465 | -0.059 | 0.765 | -0.399 | 0.058 | -0.441 | 0.017 |
| FOXO1    | <i>Foxo1</i>   | 0.603  | 0.236  | 0.302 | 0.322  | 0.139 | 0.382  | 0.094 | 0.681  | 0.001 |
| FOXO2    | <i>Foxo3</i>   | 0.168  | -0.019 | 0.924 | -0.241 | 0.220 | -0.120 | 0.562 | 0.015  | 0.933 |
| FTL      | <i>Ftl1</i>    | 0.220  | 0.118  | 0.549 | 0.193  | 0.301 | 0.164  | 0.402 | 0.214  | 0.220 |
| FXR      | <i>Nr1h4</i>   | 0.190  | 0.053  | 0.792 | -0.168 | 0.379 | 0.148  | 0.460 | 0.106  | 0.548 |
| G6PC     | <i>G6pc</i>    | 0.183  | -0.646 | 0.195 | -0.285 | 0.543 | 0.167  | 0.733 | 0.657  | 0.133 |
| GCLC     | <i>Gclc</i>    | -0.388 | 0.246  | 0.368 | 0.017  | 0.948 | -0.571 | 0.041 | -0.504 | 0.038 |
| GR       | <i>Nr3c1</i>   | 0.055  | 0.191  | 0.265 | -0.069 | 0.671 | 0.075  | 0.664 | -0.030 | 0.845 |
| GSTM1    | <i>Gstm2</i>   | 0.284  | 0.024  | 0.914 | 0.454  | 0.031 | 0.354  | 0.109 | -0.020 | 0.917 |
| GSTM2    | <i>Gstm7</i>   | -0.344 | -0.306 | 0.099 | -0.338 | 0.054 | -0.342 | 0.065 | -0.385 | 0.018 |
| HDAC4    | <i>Hdac4</i>   | 0.193  | -0.153 | 0.629 | 0.013  | 0.966 | 0.018  | 0.953 | 0.128  | 0.642 |
| HDAC5    | <i>Hdac5</i>   | -0.265 | -0.543 | 0.005 | -0.505 | 0.006 | -0.435 | 0.025 | -0.343 | 0.043 |
| HL       | <i>Lipc</i>    | -0.575 | -0.320 | 0.323 | -0.763 | 0.014 | -0.649 | 0.047 | -0.784 | 0.006 |
| HMGCS2   | <i>Hmgcs2</i>  | 0.412  | 0.102  | 0.677 | -0.066 | 0.779 | 0.183  | 0.455 | 0.356  | 0.102 |
| HNF1α    | <i>Hnf1a</i>   | 0.203  | -0.285 | 0.066 | -0.149 | 0.306 | -0.277 | 0.074 | 0.115  | 0.392 |
| HNF4α    | <i>Hnf4a</i>   | 0.338  | -0.104 | 0.665 | 0.075  | 0.744 | -0.060 | 0.802 | 0.316  | 0.139 |
| HO-1     | <i>Hmox1</i>   | 0.117  | -0.006 | 0.985 | 0.739  | 0.020 | -0.080 | 0.813 | 0.241  | 0.418 |
| IGFBP1   | <i>Igfbp1</i>  | 0.377  | 0.089  | 0.878 | 1.118  | 0.042 | 0.318  | 0.581 | 1.199  | 0.022 |
| IL-1     | <i>Il1b</i>    | -0.231 | -1.102 | 0.055 | -0.394 | 0.447 | -1.195 | 0.040 | -0.497 | 0.304 |
| INSR     | <i>Insr</i>    | 0.507  | 0.106  | 0.572 | -0.076 | 0.670 | 0.153  | 0.414 | 0.245  | 0.141 |
| IRAK     | <i>Irak1</i>   | -0.245 | 0.026  | 0.842 | 0.080  | 0.521 | -0.091 | 0.486 | -0.013 | 0.908 |
| KEAP1    | <i>Keap1</i>   | 0.076  | 0.009  | 0.946 | -0.022 | 0.857 | 0.008  | 0.950 | 0.084  | 0.452 |
| LBP      | <i>Lbp</i>     | 0.527  | -0.388 | 0.206 | 0.429  | 0.136 | 0.184  | 0.543 | 0.919  | 0.001 |
| LPL      | <i>Lpl</i>     | -0.185 | 0.763  | 0.208 | 0.938  | 0.107 | -0.668 | 0.285 | -0.623 | 0.250 |
| LRH-1    | <i>Nr5a2</i>   | 0.161  | -0.111 | 0.515 | -0.169 | 0.297 | -0.105 | 0.537 | 0.106  | 0.481 |
| MAF      | <i>Maf</i>     | 0.259  | 0.052  | 0.748 | 0.210  | 0.175 | 0.236  | 0.146 | 0.176  | 0.223 |
| MD-2     | <i>Ly96</i>    | -0.313 | -0.231 | 0.436 | -0.253 | 0.368 | -0.798 | 0.011 | -0.412 | 0.122 |
| MDR1     | <i>Abcb1a</i>  | 0.576  | 1.621  | 0.014 | 2.488  | 0.000 | 2.378  | 0.000 | 2.826  | 0.000 |
| MDR3     | <i>Abcb4</i>   | 0.260  | 0.286  | 0.150 | 0.303  | 0.110 | 0.114  | 0.568 | 0.310  | 0.080 |
| MEK5     | <i>Map2k5</i>  | 0.099  | -0.098 | 0.545 | 0.004  | 0.978 | -0.200 | 0.220 | -0.058 | 0.687 |
| MEKK1    | <i>Map3k1</i>  | -0.017 | 0.233  | 0.317 | 0.167  | 0.452 | -0.016 | 0.946 | 0.145  | 0.486 |
| MGMT     | <i>Mgmt</i>    | 0.011  | 0.128  | 0.611 | 0.040  | 0.868 | 0.215  | 0.390 | -0.103 | 0.651 |
| MRP2     | <i>Abcc2</i>   | 0.241  | 0.209  | 0.333 | 0.190  | 0.355 | 0.132  | 0.543 | 0.139  | 0.470 |
| MRP3     | <i>Abcc3</i>   | 0.083  | 0.231  | 0.420 | 0.632  | 0.020 | 0.669  | 0.019 | 0.092  | 0.718 |
| MRP4     | <i>Abcc4</i>   | 0.073  | 1.657  | 0.007 | 2.157  | 0.000 | 0.988  | 0.108 | 1.217  | 0.030 |
| MTPP     | <i>Mttp</i>    | 0.098  | -0.256 | 0.280 | -0.348 | 0.121 | -0.111 | 0.638 | 0.052  | 0.801 |

|         |                 |        |        |       |        |       |        |       |        |       |
|---------|-----------------|--------|--------|-------|--------|-------|--------|-------|--------|-------|
| MYD88   | <i>Myd88</i>    | 0.040  | -0.245 | 0.162 | -0.095 | 0.564 | -0.174 | 0.318 | 0.009  | 0.954 |
| NFκBp65 | <i>Rela</i>     | -0.300 | -0.150 | 0.371 | -0.134 | 0.396 | -0.409 | 0.016 | -0.292 | 0.049 |
| NROB2   | <i>Nr0b2</i>    | -0.288 | -0.450 | 0.261 | -0.159 | 0.673 | -0.627 | 0.120 | -0.554 | 0.114 |
| NRF2    | <i>Nfe2l2</i>   | -0.139 | -0.035 | 0.828 | -0.105 | 0.491 | -0.146 | 0.365 | -0.057 | 0.687 |
| NTCP    | <i>Slc10a1</i>  | 0.248  | -0.190 | 0.627 | -0.560 | 0.135 | -0.021 | 0.958 | -0.033 | 0.924 |
| OATP4   | <i>Slco1b2</i>  | -0.407 | 0.083  | 0.834 | -0.513 | 0.178 | -0.394 | 0.326 | -0.677 | 0.054 |
| OSTB    | <i>Slc51b</i>   | 0.578  | 0.160  | 0.838 | 1.659  | 0.023 | 1.641  | 0.031 | 2.322  | 0.001 |
| PAPSS2  | <i>Papss2</i>   | 0.585  | 0.133  | 0.603 | 0.265  | 0.276 | 0.622  | 0.014 | 0.321  | 0.157 |
| PEPCK   | <i>Pck2</i>     | 0.047  | 0.229  | 0.534 | 0.905  | 0.008 | 0.269  | 0.464 | 0.047  | 0.886 |
| PERK    | <i>Eif2ak3</i>  | -0.206 | 0.109  | 0.663 | -0.187 | 0.438 | -0.587 | 0.024 | -0.329 | 0.145 |
| PGC-1α  | <i>Ppargc1a</i> | 0.806  | -0.172 | 0.624 | 0.249  | 0.452 | 0.623  | 0.071 | 1.064  | 0.001 |
| PGC-1β  | <i>Ppargc1b</i> | 0.189  | 0.051  | 0.824 | -0.193 | 0.380 | -0.001 | 0.998 | -0.106 | 0.605 |
| PKLR    | <i>Pklr</i>     | -0.281 | -0.556 | 0.146 | -0.928 | 0.011 | -0.253 | 0.505 | -0.495 | 0.137 |
| PLTP    | <i>Pltp</i>     | -0.122 | -0.973 | 0.005 | -0.269 | 0.404 | -0.156 | 0.647 | -0.992 | 0.001 |
| PON1    | <i>Pon1</i>     | 0.017  | -0.150 | 0.613 | -0.284 | 0.315 | -0.070 | 0.813 | -0.008 | 0.974 |
| PPAR    | <i>Ppara</i>    | 0.257  | -0.004 | 0.987 | -0.055 | 0.811 | 0.114  | 0.637 | -0.037 | 0.864 |
| PPARγ   | <i>Pparg</i>    | -0.012 | 0.249  | 0.483 | 0.534  | 0.113 | 0.024  | 0.947 | -0.111 | 0.729 |
| PXR     | <i>Nr1i2</i>    | 0.805  | 0.306  | 0.204 | 0.498  | 0.030 | 0.782  | 0.001 | 0.783  | 0.000 |
| RARα    | <i>Rara</i>     | -0.358 | 0.048  | 0.765 | 0.051  | 0.739 | -0.203 | 0.217 | -0.363 | 0.013 |
| RXRα    | <i>Rxra</i>     | 0.348  | -0.026 | 0.890 | -0.001 | 0.996 | 0.041  | 0.828 | 0.135  | 0.420 |
| SCD1    | <i>Scd1</i>     | -0.123 | -0.561 | 0.125 | -0.670 | 0.053 | -0.278 | 0.444 | -0.438 | 0.169 |
| SDC1    | <i>Sdc1</i>     | 0.257  | -0.136 | 0.497 | 0.441  | 0.020 | 0.208  | 0.297 | 0.375  | 0.035 |
| SITPEC  | <i>Ecsit</i>    | 0.136  | 0.053  | 0.751 | -0.119 | 0.457 | -0.069 | 0.683 | 0.111  | 0.451 |
| SMRT    | <i>Ncor2</i>    | -0.095 | -0.029 | 0.872 | 0.219  | 0.197 | -0.123 | 0.495 | -0.074 | 0.643 |
| SOD3    | <i>Sod3</i>     | -0.247 | -0.172 | 0.466 | 0.149  | 0.501 | -0.314 | 0.186 | -0.498 | 0.017 |
| SR-BI   | <i>Scarb1</i>   | 0.155  | -0.154 | 0.397 | 0.015  | 0.930 | -0.146 | 0.422 | 0.125  | 0.438 |
| SRC-1   | <i>Ncoa1</i>    | 0.269  | -0.018 | 0.903 | -0.090 | 0.507 | 0.104  | 0.465 | 0.194  | 0.123 |
| SREBP1  | <i>Srebfl</i>   | -0.463 | -0.260 | 0.435 | -0.102 | 0.745 | -0.343 | 0.304 | -0.914 | 0.002 |
| SULT2A1 | <i>Sult2a3</i>  | 0.570  | 0.000  | 1.000 | 0.000  | 1.000 | 4.322  | 0.017 | 6.585  | 0.001 |
| SUMO1   | <i>Sumo1</i>    | 0.202  | 0.335  | 0.047 | 0.142  | 0.380 | 0.341  | 0.044 | 0.180  | 0.235 |
| TEBP    | <i>Ptges3</i>   | -0.223 | 0.113  | 0.432 | 0.002  | 0.991 | 0.056  | 0.700 | -0.021 | 0.869 |
| TLR4    | <i>Tlr4</i>     | -0.006 | -0.007 | 0.979 | 0.146  | 0.576 | 0.044  | 0.875 | 0.005  | 0.986 |
| TRAF2   | <i>Traf2</i>    | -0.004 | 0.326  | 0.163 | 0.400  | 0.071 | 0.112  | 0.638 | 0.206  | 0.330 |
| TRAF6   | <i>Traf6</i>    | 0.420  | 0.135  | 0.414 | 0.082  | 0.601 | 0.150  | 0.365 | 0.383  | 0.009 |
| UGT1A1  | <i>Ugt1a1</i>   | 0.670  | -0.010 | 0.972 | 0.310  | 0.249 | 0.523  | 0.063 | 0.805  | 0.001 |
| UGT1A9  | <i>Ugt1a9</i>   | 0.427  | 0.722  | 0.114 | 0.776  | 0.075 | 1.007  | 0.027 | 1.313  | 0.002 |
| VLDLR   | <i>Vldlr</i>    | 0.784  | 0.798  | 0.260 | 1.420  | 0.036 | 2.706  | 0.000 | 2.917  | 0.000 |
| XAP2    | <i>Aip</i>      | -0.276 | -0.335 | 0.083 | 0.042  | 0.815 | -0.139 | 0.465 | -0.453 | 0.008 |
